# Supplementary material for: A fluorescent sensor array based on carbon dots for the accurate determination of pH
Source: Royal Society of Chemistry journal article supplement (doi:10.1039/d4sd00275j), 2024-01-01
Supplement: d4sd00275j1.pdf [file d4sd00275j1.pdf]

# Supporting material for A fluorescent sensor array based on carbon dots for the accurate determination of pH

Haobo Guo<sup>a,b</sup>, Pooria Lesani<sup>a,c,d,e</sup>, Hala Zreiqat<sup>a,c</sup>, Elizabeth J. New<sup>b,c,f\*</sup>

- a. School of Biomedical Engineering, The University of Sydney, Sydney, NSW 2006, Australia.
  - b. School of Chemistry, The University of Sydney, Sydney, NSW 2006, Australia.
  - c. The University of Sydney Nano Institute, Sydney, NSW, 2006, Australia
  - d. School of Science, STEM College, RMIT University, Melbourne, VIC, 3000, Australia
  - e. Koch Institute for Integrative Cancer Research, Massachusetts Institute of Technology, Cambridge, MA, 02139, United States of America
  - f. Australian Research Council Centre of Excellence for Innovations in Peptide and Protein Science, The University of Sydney, Sydney, NSW, 2006, Australia.
- elizabeth.new@sydney.edu.au

## Table of Contents

|                                                                                  |    |
|----------------------------------------------------------------------------------|----|
| <b>List of supporting figures</b> .....                                          | 2  |
| <b>List of supporting tables</b> .....                                           | 3  |
| <b>1 Characterisation of carbon dots</b> .....                                   | 4  |
| 1.1 TEM of synthesised carbon dots .....                                         | 4  |
| 1.2 ATR characterisation of carbon dots .....                                    | 5  |
| 1.3 XPS characterisation of carbon dots .....                                    | 6  |
| 1.4 Fluorescence spectra of carbon dots under different pH conditions .....      | 8  |
| 1.5 Carbon dots' pH sensing stability .....                                      | 11 |
| 1.6 Carbon dots pH recovery test .....                                           | 11 |
| 1.7 Absorption spectra of carbon dots at different pH values .....               | 12 |
| 1.8 Naked eye visual observation of carbon dots pH probes under varying pH ..... | 12 |
| <b>2. Nine CDs based array overview</b> .....                                    | 13 |
| <b>3. MATLAB based LDA and SVM</b> .....                                         | 15 |
| 3.1 MATLAB code development .....                                                | 15 |
| 3.2 MATLAB based array optimisation results .....                                | 19 |
| <b>4 SPSS-based LDA</b> .....                                                    | 36 |
| <b>5 MATLAB based GPR</b> .....                                                  | 42 |
| 5.1 MATLAB GPR code development .....                                            | 42 |
| 5.2 GPR results .....                                                            | 47 |
| <b>6 GPR based pH sensing application with milk</b> .....                        | 47 |

## List of supporting figures

|                                                                                                                                                                                                                                                                                                                                                                                                    |    |
|----------------------------------------------------------------------------------------------------------------------------------------------------------------------------------------------------------------------------------------------------------------------------------------------------------------------------------------------------------------------------------------------------|----|
| <b>Figure S1:</b> TEM of synthesised carbon dots.....                                                                                                                                                                                                                                                                                                                                              | 4  |
| <b>Figure S2:</b> Attenuated total reflectance (ATR) spectra of the five carbon dots (a. CD100, b. CD92, c. CD69, d. CD43, and e. CD25).....                                                                                                                                                                                                                                                       | 5  |
| <b>Figure S3:</b> XPS spectra of the five CDs, in order of CD100, CD92, CD69, CD43 and CD25 from top to bottom. ....                                                                                                                                                                                                                                                                               | 6  |
| <b>Figure S4:</b> Linear relationship between the atomic percentage of oxygen in hydroxyl group (vs. nitrogen in amino group) in CDs and the pH of maximum fluorescence intensity (characterised by XPS; $r^2 = 0.9853$ ).....                                                                                                                                                                     | 8  |
| <b>Figure S5:</b> Fluorescence spectra of aqueous solutions of carbon dots (1 mg/mL) in different pH conditions. (a) CD100, (b) CD92, (c) CD69, (d) CD43, and (e) CD25.....                                                                                                                                                                                                                        | 8  |
| <b>Figure S6:</b> Fluorescence excitation and emission spectra of synthesized CDs (with $\lambda_{ex}$ 330-450 nm, and $\lambda_{em}$ 470-590 nm.).....                                                                                                                                                                                                                                            | 10 |
| <b>Figure S7:</b> Over view of CDs (three months after solution prepared) with variable pH response patterns (1 mg/mL CDs; $\lambda_{ex} = 370$ nm, $\lambda_{em}$ integrated across 390–750 nm) in buffered Milli-Q water (25 mM buffers, pH 3–10): pH responses of individual CDs: CD100 (blue), CD92 (red), CD69 (green), CD43 (purple), and CD25 (orange), respectively.....                   | 11 |
| <b>Figure S8:</b> pH recovery test with CD100 (left) and CD25 (right) (10 mL 1 mg/mL CDs solution, pH adjusted by 5 M NaOH and HCl).....                                                                                                                                                                                                                                                           | 11 |
| <b>Figure S9:</b> UV-vis absorption of five CDs under different pH buffers (a. CD100, b. CD92, c. CD69, d. CD43, and e. CD25, f. summary of CDs, at 0.25 mg/mL respectively.) .....                                                                                                                                                                                                                | 12 |
| <b>Figure S10:</b> Naked eye visual observation of CDs pH probes under varying pH conditions (Each photo contains four replicates, with each row representing one replicate. From left to right, the columns represent CDs in MilliQ water, followed by CDs exposed to pH levels 3.04, 4.07, 4.96, 5.60, 6.14, 7.18, 8.02, 9.22, and 10.089). ....                                                 | 12 |
| <b>Figure S11:</b> The LDA classification results by using nine CDs based array as pH sensor array to discriminate 8 different pH environments. ....                                                                                                                                                                                                                                               | 13 |
| <b>Figure S12:</b> Naked eye visual observation of CDs sensor array applied with milk under varying pH conditions (Each photo contains four replicates, with each row representing one replicate. From left to right, the columns represent CDs in MilliQ water and spoiled milk, followed by CDs with spoiled milk exposed to pH levels 3.06, 4.04, 5.55, 6.15, 7.2, 8.05, 9.25, and 10.09). .... | 47 |

## List of supporting tables

|                                                                                                                                                                                                  |    |
|--------------------------------------------------------------------------------------------------------------------------------------------------------------------------------------------------|----|
| <b>Table S1:</b> Size distribution of CDs based on TEM analysis.....                                                                                                                             | 4  |
| <b>Table S2:</b> Summary of X-ray photoelectron spectroscopy (XPS data) for carbon dots. ....                                                                                                    | 6  |
| <b>Table S3:</b> Summary of XPS data of the carbon region (C 1s) for carbon dots.....                                                                                                            | 7  |
| <b>Table S4:</b> Summary of XPS data of the oxygen region (O 1s) for carbon dots.....                                                                                                            | 7  |
| <b>Table S5:</b> Summary of XPS data of the nitrogen region (N 1s) for carbon dots.....                                                                                                          | 7  |
| <b>Table S6:</b> Photophysical properties of aqueous solutions of carbon dots (1 mg/mL) in different pH conditions. ....                                                                         | 9  |
| <b>Table S7:</b> LDA classification results by using nine CDs as pH sensor array .....                                                                                                           | 14 |
| <b>Table S8:</b> The features numbers matched for carbon dots.....                                                                                                                               | 19 |
| <b>Table S9:</b> Summary of the optimisation of SVM and LDA using all combinations of features shown in Table S6. Acc = accuracy; Prec = precision; Rec = recall; F1 = F1 score (F-measure)..... | 19 |
| <b>Table S10:</b> SVM and LDA data for 1- and 2-feature combinations including CD43 (feature 9). Combinations showing 100% accuracy are highlighted.....                                         | 35 |
| <b>Table S11:</b> LDA classification results using CD43 only .....                                                                                                                               | 36 |
| <b>Table S12:</b> Summary of canonical discriminant function by using CD43 only .....                                                                                                            | 37 |
| <b>Table S13:</b> Functions at group centroids using CD43 only .....                                                                                                                             | 37 |
| <b>Table S14:</b> LDA classification of array built by CD43 and CD69. ....                                                                                                                       | 38 |
| <b>Table S15:</b> Summary of canonical discriminant function using array built by CD43 and CD69. ....                                                                                            | 38 |
| <b>Table S16:</b> Functions at group centroids using array built by CD43 and CD69 .....                                                                                                          | 39 |
| <b>Table S17:</b> LDA classification results by using array built by CD43 and CD25. ....                                                                                                         | 40 |
| <b>Table S18:</b> Summary of canonical discriminant function using array built by CD43 and CD25. ....                                                                                            | 40 |
| <b>Table S19:</b> Functions at group centroids by using array built by CD43 and CD25. ....                                                                                                       | 41 |
| <b>Table S20:</b> The most promising feature combination is highlighted associate with their GPR performance .....                                                                               | 47 |

# 1 Characterisation of carbon dots

## 1.1 TEM of synthesised carbon dots

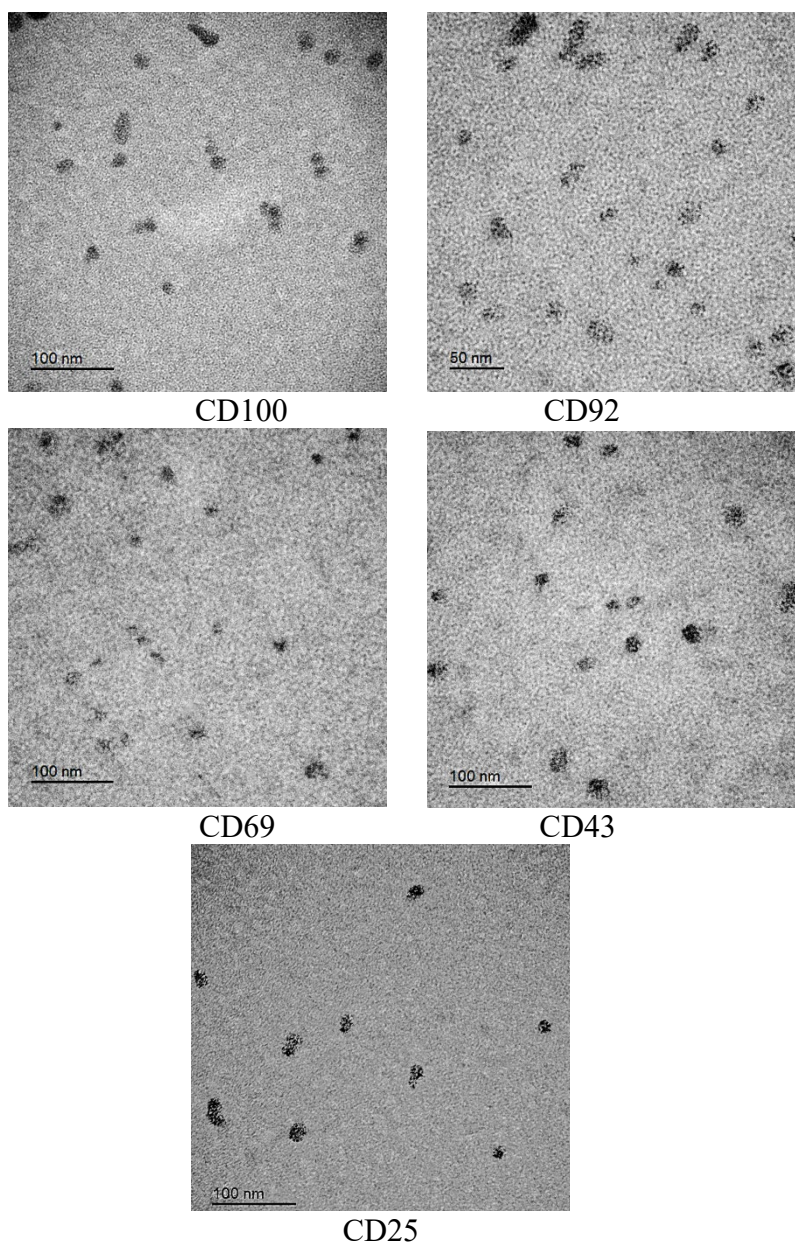

**Figure S1:** TEM of synthesised carbon dots

**Table S1:** Size distribution of CDs based on TEM analysis.

| CD    | Average diameter / nm | Standard deviation / nm | Comments                                                |
|-------|-----------------------|-------------------------|---------------------------------------------------------|
| CD100 | 10.72                 | 6.38                    |                                                         |
| CD92  | 7.95                  | 3.14                    |                                                         |
| CD69  | 10.71                 | 4.19                    | Size distribution shows two peaks (6 and 14 nm)         |
| CD43  | 11.06                 | 4.94                    | Broad range of particle sizes, most between 5 and 10 nm |
| CD25  | 15.45                 | 5.35                    |                                                         |

## 1.2 ATR characterisation of carbon dots

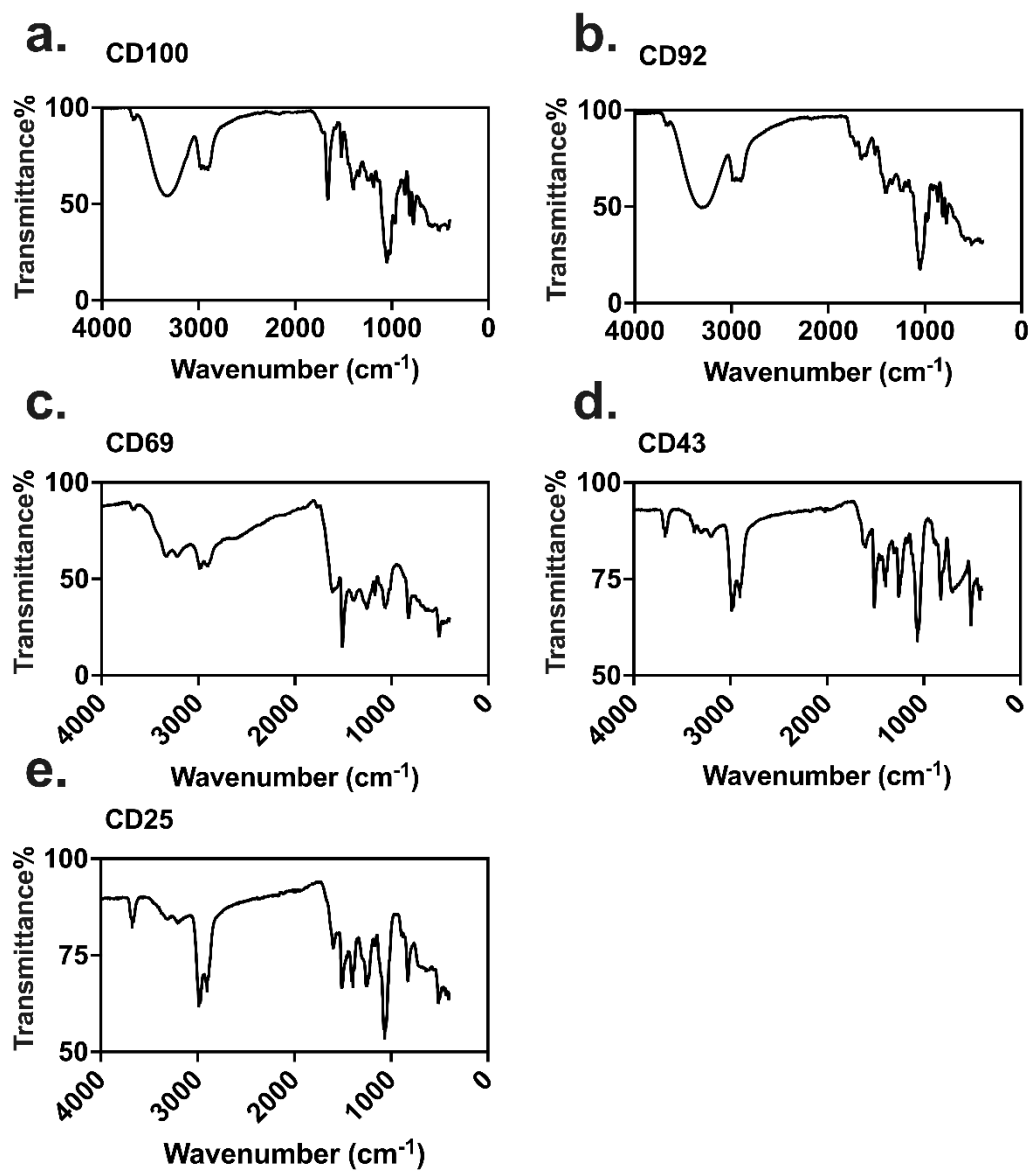

**Figure S2:** Attenuated total reflectance (ATR) spectra of the five carbon dots (a. CD100, b. CD92, c. CD69, d. CD43, and e. CD25).

### 1.3 XPS characterisation of carbon dots

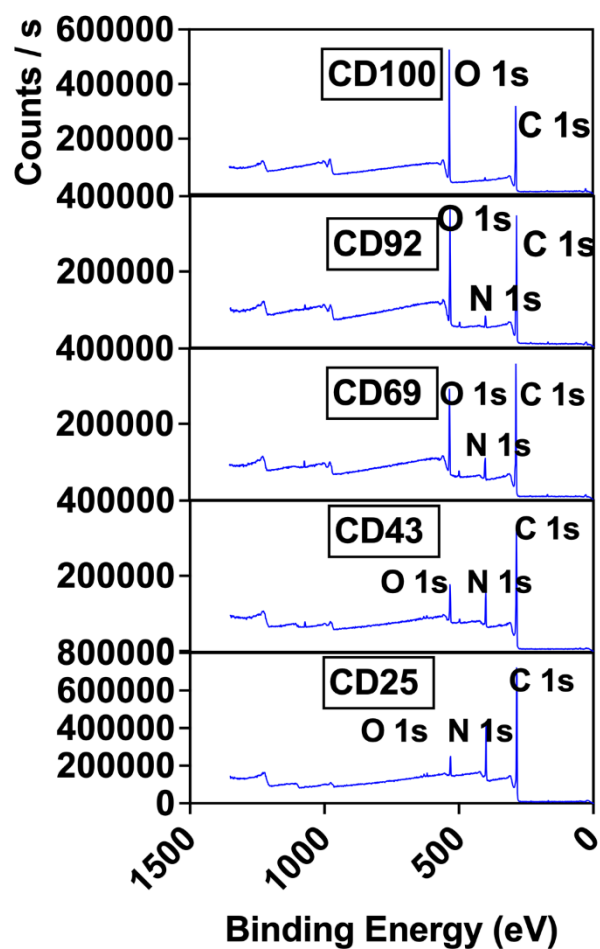

**Figure S3:** XPS spectra of the five CDs, in order of CD100, CD92, CD69, CD43 and CD25 from top to bottom.

**Table S2:** Summary of X-ray photoelectron spectroscopy (XPS data) for carbon dots.

| Carbon dot | Orbital | Peak BE <sup>a</sup> / eV | FWHM <sup>b</sup> / eV | Area (P) / CPS.eV | Atomic % |
|------------|---------|---------------------------|------------------------|-------------------|----------|
| CD100      | C1s     | 285.89                    | 3.46                   | 1101342.77        | 67.51    |
|            | O1s     | 532.97                    | 2.73                   | 1281038.55        | 32.49    |
| CD92       | C1s     | 286.12                    | 2.9                    | 1070425.44        | 68.22    |
|            | N1s     | 401.78                    | 3.77                   | 133969.56         | 5.5      |
|            | O1s     | 533.28                    | 3.24                   | 996332.28         | 26.28    |
| CD69       | C1s     | 285.93                    | 2.74                   | 1078439.21        | 70.62    |
|            | N1s     | 400.77                    | 3.93                   | 220901.22         | 9.32     |
|            | O1s     | 532.9                     | 3.2                    | 740176.29         | 20.05    |
| CD43       | C1s     | 285.87                    | 3.41                   | 1104498.22        | 75.25    |
|            | N1s     | 400.13                    | 3.21                   | 311061.83         | 13.65    |
|            | O1s     | 532.74                    | 3.59                   | 393557.56         | 11.09    |
| CD25       | C1s     | 284.84                    | 2.85                   | 2140792.94        | 77.07    |
|            | N1s     | 399.03                    | 2.78                   | 738685.36         | 17.13    |
|            | O1s     | 531.36                    | 3.23                   | 389977.55         | 5.81     |

a. BE = binding energy

b. FWHM = full width at half maximum\

**Table S3:** Summary of XPS data of the carbon region (C 1s) for carbon dots

| Carbon dot | Functional group | Peak BE / eV | FWHM / eV | Area (P) / CPS.eV | Atomic % |
|------------|------------------|--------------|-----------|-------------------|----------|
| CD100      | C-C/C=C          | 284.8        | 1.3       | 61871.39          | 43.88    |
|            | C-O              | 286.33       | 1.37      | 67489.98          | 47.91    |
|            | O-C=O            | 287.89       | 1.2       | 11562.66          | 8.22     |
| CD92       | C-C/C=C          | 284.8        | 1.53      | 100684.8          | 71.85    |
|            | C-O / C-N        | 286.65       | 1.65      | 18782.78          | 13.42    |
|            | O-C=O            | 288.82       | 1.53      | 20591.59          | 14.73    |
| CD69       | C-C/C=C          | 284.8        | 1.45      | 76479.39          | 53.59    |
|            | C-O / C-N        | 285.46       | 2.8       | 50598.77          | 35.47    |
|            | O-C=O            | 288.72       | 1.85      | 15583.86          | 10.95    |
| CD43       | C-C/C=C          | 284.8        | 1.53      | 23897.45          | 16.31    |
|            | C-O / C-N        | 285.94       | 2.65      | 114934.7          | 78.5     |
|            | O-C=O            | 289.36       | 3.37      | 7574.72           | 5.19     |
| CD25       | C-C/C=C          | 284.8        | 0.92      | 36832.34          | 14.13    |
|            | C-O / C-N        | 285.53       | 2.03      | 217490.85         | 83.48    |
|            | O-C=O            | 288.16       | 1.4       | 6229.01           | 2.39     |

**Table S4:** Summary of XPS data of the oxygen region (O 1s) for carbon dots

| Carbon dot | Functional group | Peak BE / eV | FWHM / eV | Area (P) / CPS.eV | Atomic % |
|------------|------------------|--------------|-----------|-------------------|----------|
| CD100      | -OH              | 532.77       | 1.63      | 138287.57         | 85.04    |
|            | =O               | 533.26       | 2.07      | 24319.89          | 14.96    |
| CD92       | -OH              | 531.61       | 1.45      | 19714.04          | 14.63    |
|            | =O               | 532.51       | 2.51      | 114910.67         | 85.37    |
| CD69       | -OH              | 531.36       | 1.41      | 19107.95          | 18.51    |
|            | =O               | 532.37       | 2.54      | 84049.2           | 81.49    |
| CD43       | -OH              | 532.65       | 3.08      | 52160.32          | 100      |
| CD25       | -OH              | 531.52       | 1.41      | 11596.08          | 23.43    |
|            | =O               | 532.53       | 2.76      | 37861.02          | 76.57    |

**Table S5:** Summary of XPS data of the nitrogen region (N 1s) for carbon dots

| Carbon dot | Functional group | Peak BE / eV | FWHM / eV | Area (P) / CPS.eV | Atomic % |
|------------|------------------|--------------|-----------|-------------------|----------|
| CD92       | Amino N          | 400.78       | 2.13      | 8525.03           | 50.73    |
|            | Graphitic N      | 402.64       | 1.82      | 8270.06           | 49.27    |
| CD69       | Amino N          | 400.13       | 1.71      | 16827.02          | 60.14    |
|            | Graphitic N      | 402.16       | 1.93      | 11138.72          | 39.86    |
| CD43       | Amino N          | 399.79       | 2.67      | 41330.05          | 100      |
| CD25       | Amino N          | 398.92       | 1.63      | 105106.06         | 100      |

**Figure S4:** Linear relationship between the atomic percentage of oxygen in hydroxyl group (vs. nitrogen in amino group) in CDs and the pH of maximum fluorescence intensity (characterised by XPS;  $r_2 = 0.9853$ ).

#### 1.4 Fluorescence spectra of carbon dots under different pH conditions

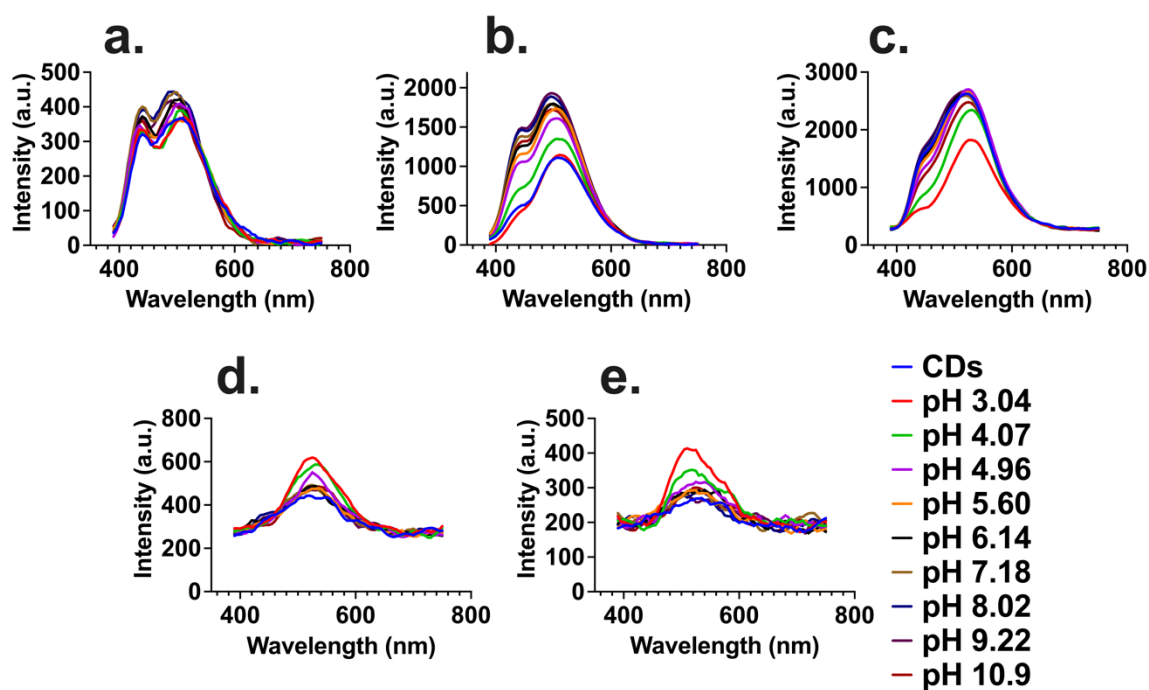

**Figure S5:** Fluorescence spectra of aqueous solutions of carbon dots (1 mg/mL) in different pH conditions. (a) CD100, (b) CD92, (c) CD69, (d) CD43, and (e) CD25.



**Table S6:** Photophysical properties of aqueous solutions of carbon dots (1 mg/mL) in different pH conditions.

| Carbon dot |                         | CDs only | pH 3.04 | pH 4.07 | pH 4.96 | pH 5.60 | pH 6.14 | pH 7.18 | pH 8.02 | pH 9.22 | pH 10.9 |
|------------|-------------------------|----------|---------|---------|---------|---------|---------|---------|---------|---------|---------|
| CD100      | Emission maximum / nm   | 500      | 495     | 520     | 505     | 510     | 490     | 495     | 485     | 480     | 505     |
|            | Excitation maximum / nm | 355      | 360     | 360     | 365     | 375     | 370     | 390     | 395     | 395     | 400     |
|            | Stokes shift / nm       | 145      | 135     | 160     | 140     | 135     | 120     | 105     | 90      | 85      | 105     |
| CD92       | Emission maximum / nm   | 510      | 515     | 505     | 505     | 500     | 500     | 490     | 500     | 500     | 500     |
|            | Excitation maximum / nm | 395      | 370     | 385     | 370     | 370     | 385     | 370     | 375     | 370     | 370     |
|            | Stokes shift / nm       | 115      | 145     | 120     | 135     | 130     | 115     | 120     | 125     | 130     | 130     |
| CD69       | Emission maximum / nm   | 525      | 530     | 525     | 515     | 525     | 525     | 515     | 525     | 510     | 525     |
|            | Excitation maximum / nm | 370      | 375     | 370     | 370     | 370     | 370     | 365     | 370     | 365     | 370     |
|            | Stokes shift / nm       | 155      | 155     | 155     | 145     | 155     | 155     | 150     | 155     | 145     | 155     |
| CD43       | Emission maximum / nm   | 535      | 520     | 530     | 525     | 535     | 525     | 515     | 535     | 530     | 525     |
|            | Excitation maximum / nm | 365      | 380     | 370     | 370     | 375     | 370     | 370     | 365     | 350     | 350     |
|            | Stokes shift / nm       | 170      | 140     | 160     | 155     | 160     | 155     | 145     | 170     | 180     | 175     |
| CD25       | Emission maximum / nm   | 525      | 520     | 520     | 520     | 555     | 560     | 505     | 540     | 540     | 510     |
|            | Excitation maximum / nm | 370      | 380     | 370     | 370     | 370     | 370     | 375     | 350     | 370     | 365     |
|            | Stokes shift / nm       | 155      | 140     | 150     | 150     | 185     | 190     | 130     | 190     | 170     | 145     |

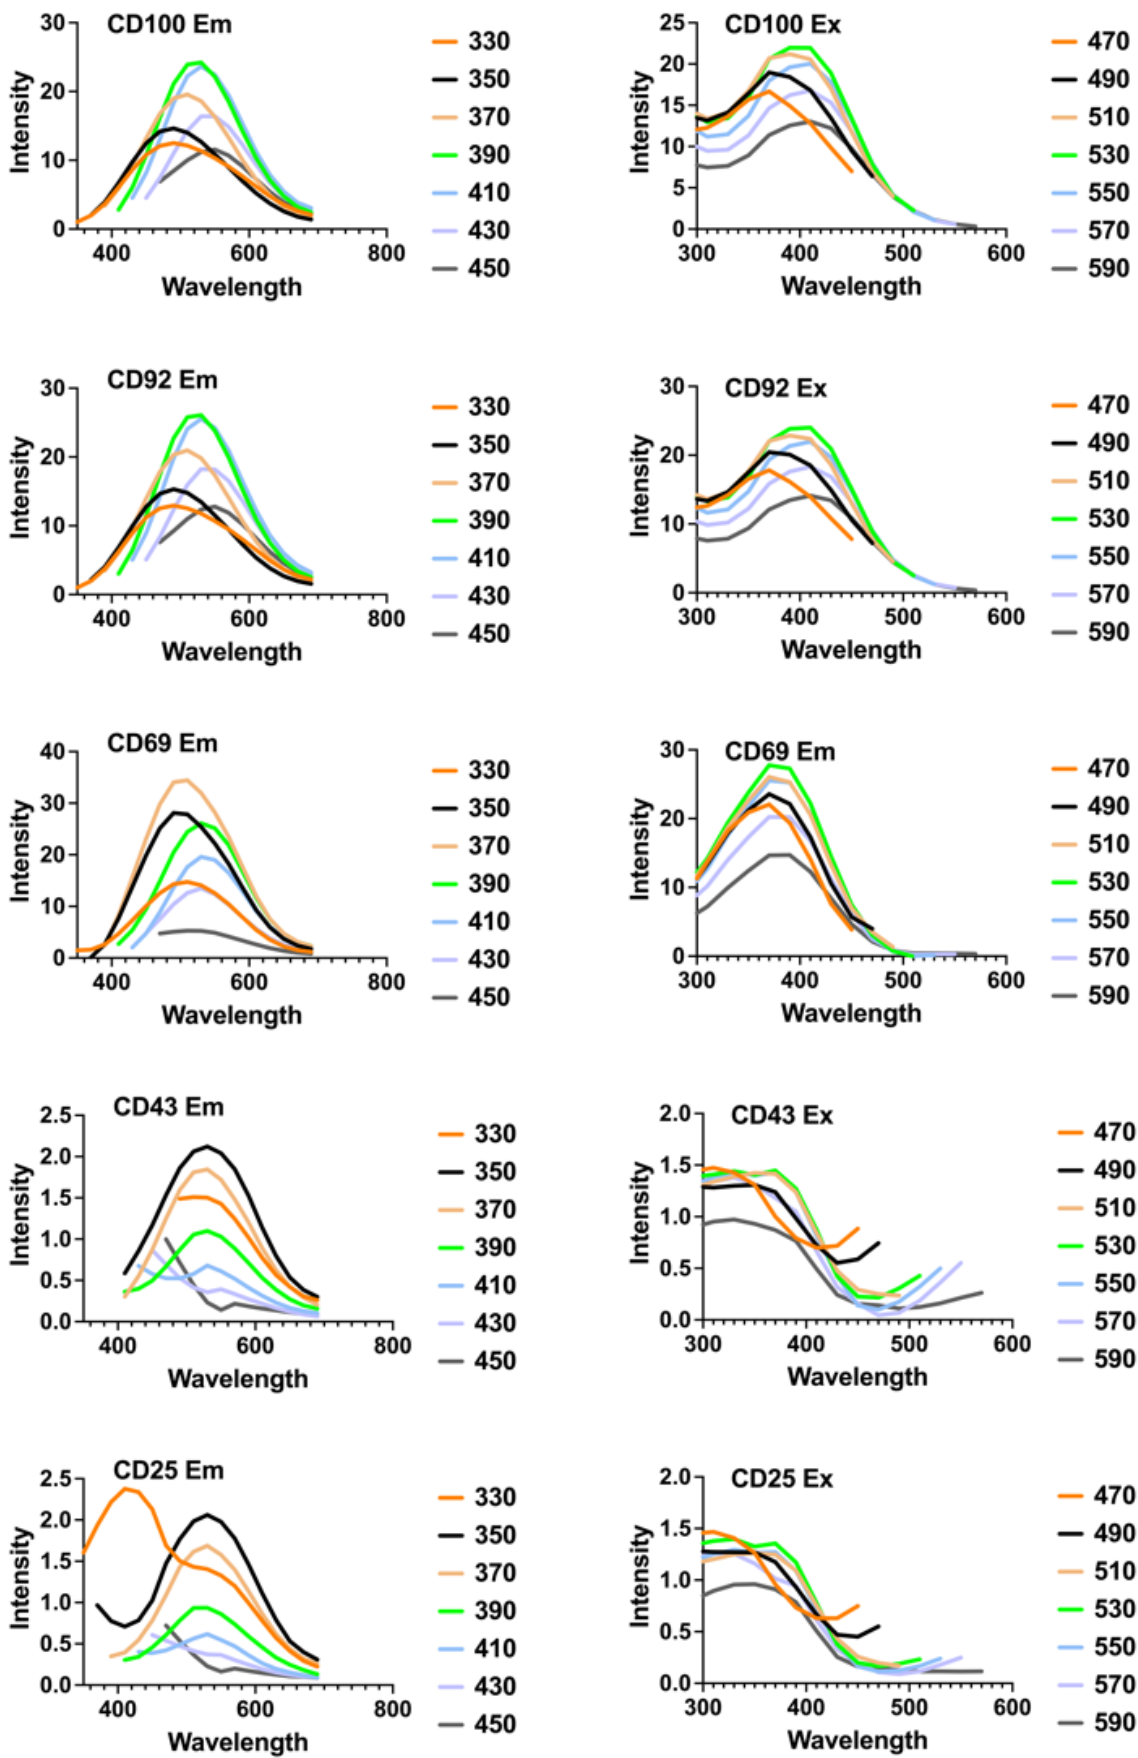

**Figure S6:** Fluorescence excitation and emission spectra of synthesized CDs (with  $\lambda_{ex}$  330-450 nm, and  $\lambda_{em}$  470-590 nm.)

### 1.5 Carbon dots' pH sensing stability

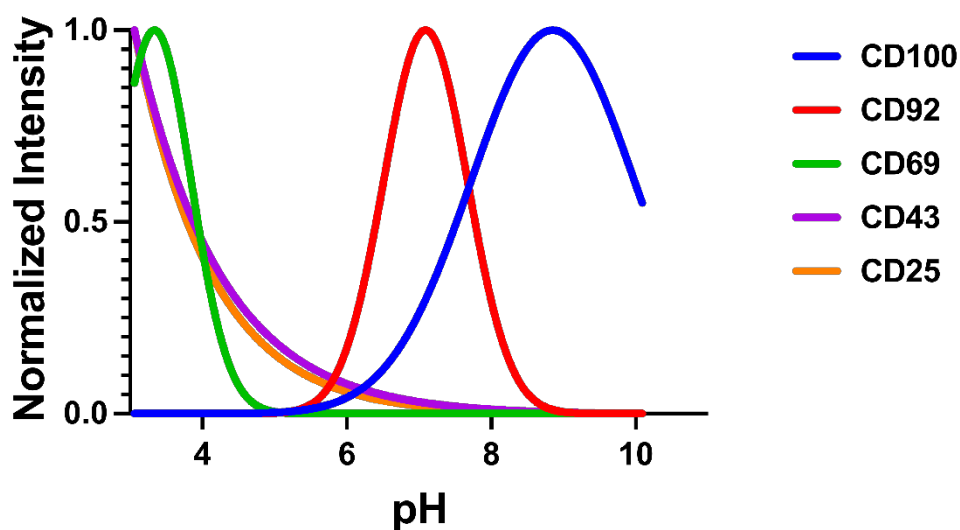

**Figure S7:** Over view of CDs (three months after solution prepared) with variable pH response patterns (1 mg/mL CDs;  $\lambda_{ex} = 370$  nm,  $\lambda_{em}$  integrated across 390–750 nm) in buffered Milli-Q water (25 mM buffers, pH 3–10): pH responses of individual CDs: CD100 (blue), CD92 (red), CD69 (green), CD43 (purple), and CD25 (orange), respectively.

### 1.6 Carbon dots pH recovery test.

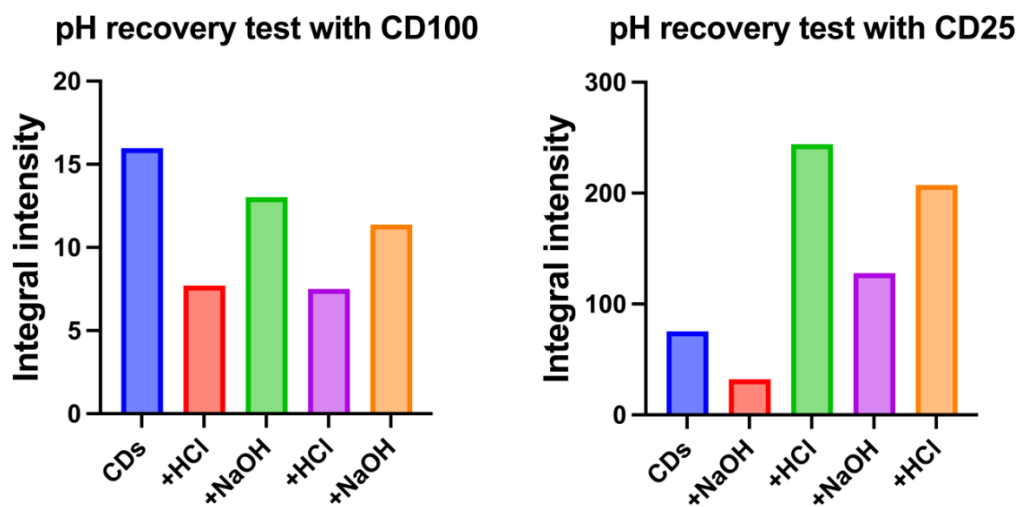

**Figure S8:** pH recovery test with CD100 (left) and CD25 (right) (10 mL 1 mg/mL CDs solution, pH adjusted by 5 M NaOH and HCl).

## 1.7 Absorption spectra of carbon dots at different pH values

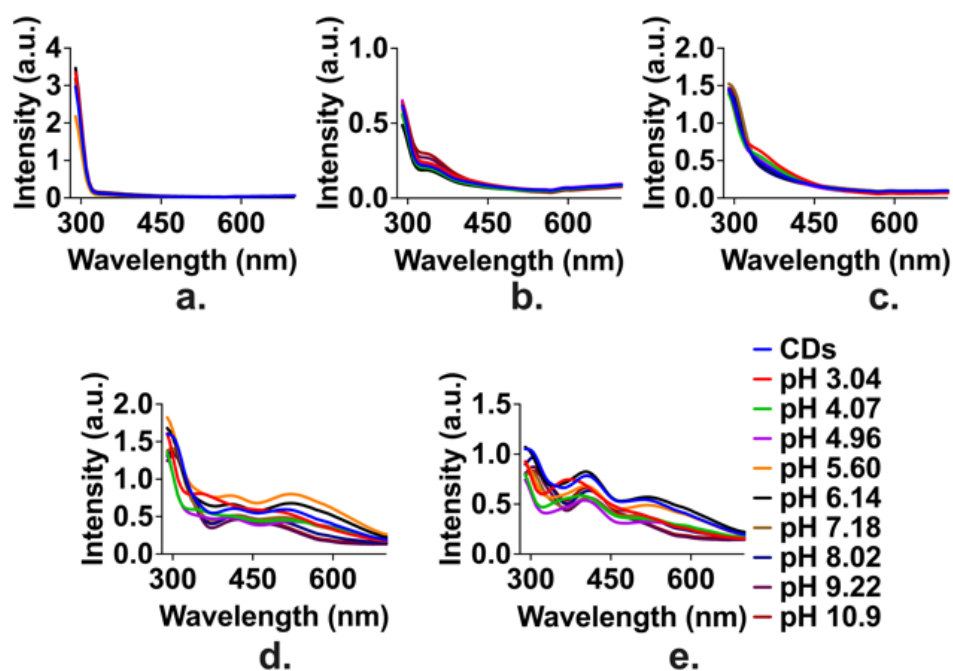

**Figure S9:** UV-vis absorption of five CDs under different pH buffers (a. CD100, b. CD92, c. CD69, d. CD43, and e. CD25, f. summary of CDs, at 0.25 mg/mL respectively.)

## 1.8 Naked eye visual observation of carbon dots pH probes under varying pH

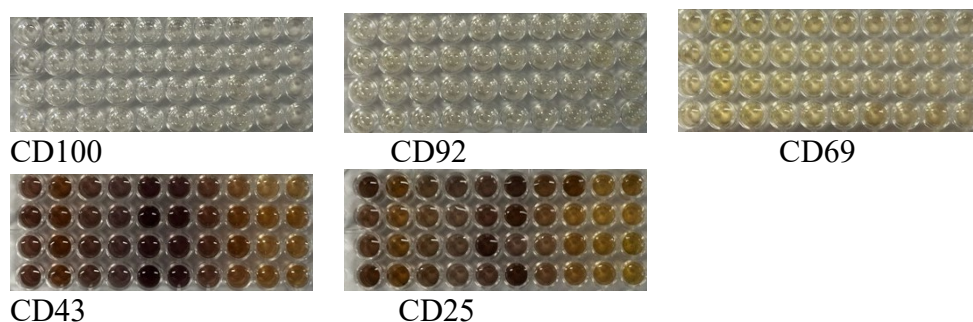

**Figure S10:** Naked eye visual observation of CDs pH probes under varying pH conditions (Each photo contains four replicates, with each row representing one replicate. From left to right, the columns represent CDs in MilliQ water, followed by CDs exposed to pH levels 3.04, 4.07, 4.96, 5.60, 6.14, 7.18, 8.02, 9.22, and 10.089).

## 2. Nine CDs based array overview

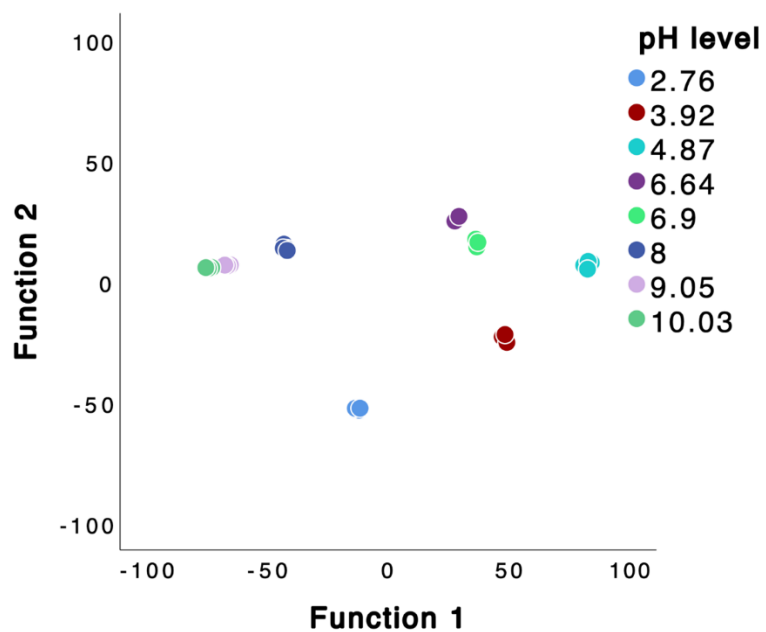

**Figure S11:** The LDA classification results by using nine CDs based array as pH sensor array to discriminate 8 different pH environments.

**Table S7:** LDA classification results by using nine CDs as pH sensor array

| Classification Results <sup>a,c</sup> |       |      |                            |     |     |     |     |     |     |       |     |
|---------------------------------------|-------|------|----------------------------|-----|-----|-----|-----|-----|-----|-------|-----|
| Items                                 |       | pH   | Predicted Group Membership |     |     |     |     |     |     | Total |     |
|                                       |       |      | 2.8                        | 3.9 | 4.9 | 6.6 | 6.9 | 8   | 9.1 |       | 10  |
| Original                              | Count | 2.76 | 4                          | 0   | 0   | 0   | 0   | 0   | 0   | 0     | 4   |
|                                       |       | 3.92 | 0                          | 4   | 0   | 0   | 0   | 0   | 0   | 0     | 4   |
|                                       |       | 4.87 | 0                          | 0   | 4   | 0   | 0   | 0   | 0   | 0     | 4   |
|                                       |       | 6.64 | 0                          | 0   | 0   | 4   | 0   | 0   | 0   | 0     | 4   |
|                                       |       | 6.9  | 0                          | 0   | 0   | 0   | 4   | 0   | 0   | 0     | 4   |
|                                       |       | 8    | 0                          | 0   | 0   | 0   | 0   | 4   | 0   | 0     | 4   |
|                                       |       | 9.05 | 0                          | 0   | 0   | 0   | 0   | 0   | 4   | 0     | 4   |
|                                       |       | 10   | 0                          | 0   | 0   | 0   | 0   | 0   | 0   | 4     | 4   |
|                                       | %     | 2.76 | 100                        | 0   | 0   | 0   | 0   | 0   | 0   | 0     | 100 |
|                                       |       | 3.92 | 0                          | 100 | 0   | 0   | 0   | 0   | 0   | 0     | 100 |
|                                       |       | 4.87 | 0                          | 0   | 100 | 0   | 0   | 0   | 0   | 0     | 100 |
|                                       |       | 6.64 | 0                          | 0   | 0   | 100 | 0   | 0   | 0   | 0     | 100 |
|                                       |       | 6.9  | 0                          | 0   | 0   | 0   | 100 | 0   | 0   | 0     | 100 |
|                                       |       | 8    | 0                          | 0   | 0   | 0   | 0   | 100 | 0   | 0     | 100 |
| 9.05                                  |       | 0    | 0                          | 0   | 0   | 0   | 0   | 100 | 0   | 100   |     |
| 10                                    |       | 0    | 0                          | 0   | 0   | 0   | 0   | 0   | 100 | 100   |     |
| Cross-validated <sup>b</sup>          | Count | 2.76 | 4                          | 0   | 0   | 0   | 0   | 0   | 0   | 0     | 4   |
|                                       |       | 3.92 | 0                          | 4   | 0   | 0   | 0   | 0   | 0   | 0     | 4   |
|                                       |       | 4.87 | 0                          | 0   | 4   | 0   | 0   | 0   | 0   | 0     | 4   |
|                                       |       | 6.64 | 0                          | 0   | 0   | 4   | 0   | 0   | 0   | 0     | 4   |
|                                       |       | 6.9  | 0                          | 0   | 0   | 0   | 4   | 0   | 0   | 0     | 4   |
|                                       |       | 8    | 0                          | 0   | 0   | 0   | 0   | 4   | 0   | 0     | 4   |
|                                       |       | 9.05 | 0                          | 0   | 0   | 0   | 0   | 0   | 4   | 0     | 4   |
|                                       |       | 10   | 0                          | 0   | 0   | 0   | 0   | 0   | 0   | 4     | 4   |
|                                       | %     | 2.76 | 100                        | 0   | 0   | 0   | 0   | 0   | 0   | 0     | 100 |
|                                       |       | 3.92 | 0                          | 100 | 0   | 0   | 0   | 0   | 0   | 0     | 100 |
|                                       |       | 4.87 | 0                          | 0   | 100 | 0   | 0   | 0   | 0   | 0     | 100 |
|                                       |       | 6.64 | 0                          | 0   | 0   | 100 | 0   | 0   | 0   | 0     | 100 |
|                                       |       | 6.9  | 0                          | 0   | 0   | 0   | 100 | 0   | 0   | 0     | 100 |
|                                       |       | 8    | 0                          | 0   | 0   | 0   | 0   | 100 | 0   | 0     | 100 |
| 9.05                                  |       | 0    | 0                          | 0   | 0   | 0   | 0   | 100 | 0   | 100   |     |
| 10                                    |       | 0    | 0                          | 0   | 0   | 0   | 0   | 0   | 100 | 100   |     |

a. 100.0% of original grouped cases correctly classified.

b. Cross validation is done only for those cases in the analysis. In cross validation, each case is classified by the functions derived from all cases other than that case.

c. 100.0% of cross-validated grouped cases correctly classified.

### 3. MATLAB based LDA and SVM

#### 3.1 MATLAB code development

Here we introduce the development of MATLAB based array classification and optimisation program. This MATLAB code was designed to develop and evaluate both support vector machine (SVM) and linear discriminant analysis (LDA) models for classifying pH levels based on feature data.

Data loading and preprocessing: The code began by clearing the workspace and setting up directories and files for storing results. It then loaded the dataset from an Excel file and displayed a message indicating the successful data load:

```
clear;
%% Load data
files = strcat('Data.xlsx');
mkdir result
fileID = fopen('result/SVM_LDA_result.txt','w');
[data,txt,row] = xlsread(files); % load data
disp('Data loaded successfully');
disp(['Size of data: ', num2str(size(data))]);

% Extract pH levels and features
pH_levels = txt(2:end, 1); % Assuming the first row is the header
features = data(:, 1:end); % Features are from the first column to the last column
```

The feature data were then normalised, and the normalised data were saved to a file:

```
% Normalize the feature data
normalized_features = normalize(features);

% Save the normalized data to a file
normalized_data_filename = 'result/normalized_data.xlsx';
normalized_data = [pH_levels, num2cell(normalized_features)];
writecell([txt(1, :); normalized_data], normalized_data_filename);
disp(['Normalized data saved to ', normalized_data_filename]);
```

Data conversion and cross-validation setup: The pH levels were converted to categorical labels, and a 4-fold cross-validation setup was prepared:

```
% Convert pH levels to categorical labels
[pH_levels, ~, labels] = unique(pH_levels);

% Determine the number of unique pH levels
numClasses = length(unique(labels));

indices = crossvalind('Kfold', labels, 4); % Develop 4-fold cross-validation
```

Model training and performance evaluation: For each combination of features, the script trained SVM and LDA models and evaluated their performance using cross-validation. The performance metrics were stored in a table and written to a result file:

```

% Initialize a table to store performance metrics
columnNames = {'FeatureSet', 'SVM_Accuracy', 'SVM_Precision', 'SVM_Recall', 'SVM_F1', 'LDA_Accuracy',
'LDA_Precision', 'LDA_Recall', 'LDA_F1'};
perfMetrics = table('Size', [0, 9], 'VariableTypes', {'string', 'double', 'double', 'double', 'double', 'double', 'double',
'double', 'double'}, 'VariableNames', columnNames);

for feature_num = 1:9 % Assuming 9 features to represent the CDs
    disp(['Processing feature number: ', num2str(feature_num)]);
    C = nchoosek(1:9, feature_num); % Combinations of features
    for i = 1:size(C, 1)
        disp(['Processing combination: ', num2str(i), ' of feature_num: ', num2str(feature_num)]);
        feature_select = C(i,:);
        feature_data = normalized_features(:, feature_select); % Select features

        % Initialize variables to accumulate metrics
        metrics_svm = zeros(4, 4); % 4 metrics (accuracy, precision, recall, f1) for each fold
        metrics_lda = zeros(4, 4);
        for k = 1:4 % 4-fold cross-validation
            disp(['Cross-validation fold: ', num2str(k)]);
            test = (indices == k);
            train = ~test;
            train_data = feature_data(train, :);
            train_label = labels(train);
            test_data = feature_data(test, :);
            test_label = labels(test);

            % Train SVM model using fitcecoc for multi-class classification
            svm_model = fitcecoc(train_data, train_label, 'Learners', templateSVM('KernelFunction', 'linear',
'BoxConstraint', 1));
            predicted_label_svm = predict(svm_model, test_data);
            [acc_svm, prec_svm, rec_svm, f1_svm] = calculateMetrics(predicted_label_svm, test_label,
numClasses);
            metrics_svm(k, :) = [acc_svm, prec_svm, rec_svm, f1_svm];
            disp(['SVM accuracy on fold ', num2str(k), ': ', num2str(acc_svm)]);

            % Train LDA model with 'pseudoLinear' type
            lda_model = fitdiscr(train_data, train_label, 'DiscrimType', 'pseudoLinear');
            predicted_label_lda = predict(lda_model, test_data);
            [acc_lda, prec_lda, rec_lda, f1_lda] = calculateMetrics(predicted_label_lda, test_label, numClasses);
            metrics_lda(k, :) = [acc_lda, prec_lda, rec_lda, f1_lda];
            disp(['LDA accuracy on fold ', num2str(k), ': ', num2str(acc_lda)]);
        end
        disp(['Completed processing feature set: ', num2str(feature_select)]);
        % Calculate average metrics over folds
        avgMetrics_svm = mean(metrics_svm, 1);
        avgMetrics_lda = mean(metrics_lda, 1);
        % Store in the performance metrics table
        newRow = {mat2str(feature_select), avgMetrics_svm(1), avgMetrics_svm(2), avgMetrics_svm(3),
avgMetrics_svm(4), avgMetrics_lda(1), avgMetrics_lda(2), avgMetrics_lda(3), avgMetrics_lda(4)};
        perfMetrics = [perfMetrics; newRow];

        % Write performance metrics to file after each feature set processing
        fprintf(fileID, 'Feature set: %s, SVM: Acc: %f, Prec: %f, Rec: %f, F1: %f, LDA: Acc: %f, Prec: %f,
Rec: %f, F1: %f\n', ...
            perfMetrics.FeatureSet{end}, perfMetrics.SVM_Accuracy(end), perfMetrics.SVM_Precision(end),
perfMetrics.SVM_Recall(end), perfMetrics.SVM_F1(end), ...
            perfMetrics.LDA_Accuracy(end), perfMetrics.LDA_Precision(end), perfMetrics.LDA_Recall(end),
perfMetrics.LDA_F1(end));
    end
end
end

```



```
fclose(fileID);
disp('Program completed.');
```

Best performing feature set identification: The script identified the best performing feature set for both SVM and LDA based on the accuracy metric:

```
% Identify the best performing combination for SVM
[~, best_svm_idx] = max(perfMetrics.SVM_Accuracy);
best_svm_features = perfMetrics.FeatureSet{best_svm_idx};
best_svm_accuracy = perfMetrics.SVM_Accuracy(best_svm_idx);
best_svm_precision = perfMetrics.SVM_Precision(best_svm_idx);
best_svm_recall = perfMetrics.SVM_Recall(best_svm_idx);
best_svm_f1 = perfMetrics.SVM_F1(best_svm_idx);
```

```
disp('Best SVM Feature Set:');
disp(['Feature Set: ', best_svm_features]);
disp(['Accuracy: ', num2str(best_svm_accuracy)]);
disp(['Precision: ', num2str(best_svm_precision)]);
disp(['Recall: ', num2str(best_svm_recall)]);
disp(['F1 Score: ', num2str(best_svm_f1)]);
```

```
% Identify the best performing combination for LDA
[~, best_lda_idx] = max(perfMetrics.LDA_Accuracy);
best_lda_features = perfMetrics.FeatureSet{best_lda_idx};
best_lda_accuracy = perfMetrics.LDA_Accuracy(best_lda_idx);
best_lda_precision = perfMetrics.LDA_Precision(best_lda_idx);
best_lda_recall = perfMetrics.LDA_Recall(best_lda_idx);
best_lda_f1 = perfMetrics.LDA_F1(best_lda_idx);
```

```
disp('Best LDA Feature Set:');
disp(['Feature Set: ', best_lda_features]);
disp(['Accuracy: ', num2str(best_lda_accuracy)]);
disp(['Precision: ', num2str(best_lda_precision)]);
disp(['Recall: ', num2str(best_lda_recall)]);
disp(['F1 Score: ', num2str(best_lda_f1)]);
```

Utility function for metric calculation: A utility function was included to calculate the accuracy, precision, recall, and F1 score for the predicted labels:

```
function [accuracy, precision, recall, f1score] = calculateMetrics(predicted, actual, numClasses)
% Calculate confusion matrix
cm = confusionmat(actual, predicted);

% Initialize metrics
classPrecision = zeros(numClasses, 1);
classRecall = zeros(numClasses, 1);

% Calculate precision and recall for each class
for i = 1:numClasses
    truePositives = cm(i, i);
    falsePositives = sum(cm(:, i)) - truePositives;
    falseNegatives = sum(cm(i, :)) - truePositives;

    classPrecision(i) = truePositives / (truePositives + falsePositives);
    classRecall(i) = truePositives / (truePositives + falseNegatives);
end
```

```
% Handle NaN cases (if any division by zero occurs)
classPrecision(isnan(classPrecision)) = 0;
classRecall(isnan(classRecall)) = 0;

% Calculate macro-averaged precision, recall, and F1 score
precision = mean(classPrecision);
recall = mean(classRecall);
f1score = 2 * (precision * recall) / (precision + recall);

% Calculate overall accuracy
accuracy = sum(diag(cm)) / sum(cm(:));
end
```

This structured approach ensured a thorough evaluation of different feature combinations, providing insights into the optimal configuration for accurate pH level classification using SVM and LDA models.

### 3.2 MATLAB based array optimisation results

**Table S8:** The features numbers matched for carbon dots

| Feature number | Carbon dot                        |
|----------------|-----------------------------------|
| 1              | CD100                             |
| 2              | CD100 (-OH protected)             |
| 3              | CD69                              |
| 4              | CD69 (-OH protected)              |
| 5              | CD69 (-NH <sub>2</sub> protected) |
| 6              | CD25                              |
| 7              | CD25 (-NH <sub>2</sub> protected) |
| 8              | CD92                              |
| 9              | CD43                              |

**Table S9:** Summary of the optimisation of SVM and LDA using all combinations of features shown in Table S7. Acc = accuracy; Prec = precision; Rec = recall; F1 = F1 score (F-measure).

| Feature set | SVM      |          |          |          | LDA      |          |          |          |
|-------------|----------|----------|----------|----------|----------|----------|----------|----------|
|             | Acc.     | Prec.    | Rec.     | F1       | Acc.     | Prec.    | Rec.     | F1       |
| 1           | 0.750000 | 0.672619 | 0.750000 | 0.708981 | 0.785714 | 0.732143 | 0.785714 | 0.757475 |
| 2           | 0.250000 | 0.098214 | 0.250000 | 0.139751 | 0.214286 | 0.113095 | 0.214286 | 0.144558 |
| 3           | 0.785714 | 0.714286 | 0.785714 | 0.747239 | 0.750000 | 0.696429 | 0.750000 | 0.720842 |
| 4           | 0.428571 | 0.297619 | 0.428571 | 0.346918 | 0.500000 | 0.386905 | 0.500000 | 0.434917 |
| 5           | 0.571429 | 0.470238 | 0.571429 | 0.515699 | 0.714286 | 0.595238 | 0.714286 | 0.649093 |
| 6           | 0.571429 | 0.488095 | 0.571429 | 0.526084 | 0.642857 | 0.535714 | 0.642857 | 0.580525 |
| 7           | 0.464286 | 0.375000 | 0.464286 | 0.412245 | 0.571429 | 0.470238 | 0.571429 | 0.515306 |
| 8           | 0.714286 | 0.642857 | 0.714286 | 0.675604 | 0.750000 | 0.732143 | 0.750000 | 0.740683 |
| 9           | 1.000000 | 1.000000 | 1.000000 | 1.000000 | 1.000000 | 1.000000 | 1.000000 | 1.000000 |
| 1 2         | 0.678571 | 0.559524 | 0.678571 | 0.612186 | 0.785714 | 0.726190 | 0.785714 | 0.754012 |
| 1 3         | 0.857143 | 0.803571 | 0.857143 | 0.829111 | 0.857143 | 0.821429 | 0.857143 | 0.838509 |
| 1 4         | 0.964286 | 0.946429 | 0.964286 | 0.954969 | 0.964286 | 0.946429 | 0.964286 | 0.954969 |
| 1 5         | 0.892857 | 0.851190 | 0.892857 | 0.870785 | 0.892857 | 0.851190 | 0.892857 | 0.870785 |
| 1 6         | 0.928571 | 0.892857 | 0.928571 | 0.909938 | 0.928571 | 0.892857 | 0.928571 | 0.909938 |
| 1 7         | 0.750000 | 0.696429 | 0.750000 | 0.721679 | 0.750000 | 0.678571 | 0.750000 | 0.712444 |
| 1 8         | 0.928571 | 0.892857 | 0.928571 | 0.909938 | 1.000000 | 1.000000 | 1.000000 | 1.000000 |
| 1 9         | 0.964286 | 0.946429 | 0.964286 | 0.954969 | 1.000000 | 1.000000 | 1.000000 | 1.000000 |
| 2 3         | 0.571429 | 0.410714 | 0.571429 | 0.472666 | 0.714286 | 0.678571 | 0.714286 | 0.695445 |
| 2 4         | 0.607143 | 0.455357 | 0.607143 | 0.518857 | 0.535714 | 0.458333 | 0.535714 | 0.492515 |

|       |          |          |          |          |          |          |          |          |
|-------|----------|----------|----------|----------|----------|----------|----------|----------|
| 2 5   | 0.535714 | 0.389881 | 0.535714 | 0.451220 | 0.678571 | 0.565476 | 0.678571 | 0.615058 |
| 2 6   | 0.607143 | 0.508929 | 0.607143 | 0.553476 | 0.607143 | 0.547619 | 0.607143 | 0.573436 |
| 2 7   | 0.500000 | 0.392857 | 0.500000 | 0.438424 | 0.500000 | 0.434524 | 0.500000 | 0.464054 |
| 2 8   | 0.642857 | 0.511905 | 0.642857 | 0.569444 | 0.892857 | 0.839286 | 0.892857 | 0.863699 |
| 2 9   | 0.535714 | 0.410714 | 0.535714 | 0.463946 | 1.000000 | 1.000000 | 1.000000 | 1.000000 |
| 3 4   | 0.928571 | 0.892857 | 0.928571 | 0.909938 | 1.000000 | 1.000000 | 1.000000 | 1.000000 |
| 3 5   | 0.928571 | 0.892857 | 0.928571 | 0.909938 | 0.928571 | 0.892857 | 0.928571 | 0.909938 |
| 3 6   | 0.964286 | 0.946429 | 0.964286 | 0.954969 | 1.000000 | 1.000000 | 1.000000 | 1.000000 |
| 3 7   | 0.785714 | 0.750000 | 0.785714 | 0.767081 | 0.750000 | 0.732143 | 0.750000 | 0.740683 |
| 3 8   | 0.964286 | 0.946429 | 0.964286 | 0.954969 | 1.000000 | 1.000000 | 1.000000 | 1.000000 |
| 3 9   | 1.000000 | 1.000000 | 1.000000 | 1.000000 | 1.000000 | 1.000000 | 1.000000 | 1.000000 |
| 4 5   | 0.642857 | 0.523810 | 0.642857 | 0.577201 | 0.750000 | 0.660714 | 0.750000 | 0.702045 |
| 4 6   | 0.642857 | 0.494048 | 0.642857 | 0.557221 | 0.642857 | 0.494048 | 0.642857 | 0.557221 |
| 4 7   | 0.714286 | 0.625000 | 0.714286 | 0.666205 | 0.785714 | 0.678571 | 0.785714 | 0.727398 |
| 4 8   | 0.892857 | 0.857143 | 0.892857 | 0.874142 | 0.928571 | 0.892857 | 0.928571 | 0.909938 |
| 4 9   | 0.821429 | 0.732143 | 0.821429 | 0.773637 | 1.000000 | 1.000000 | 1.000000 | 1.000000 |
| 5 6   | 0.678571 | 0.580357 | 0.678571 | 0.625111 | 0.642857 | 0.541667 | 0.642857 | 0.586789 |
| 5 7   | 0.678571 | 0.583333 | 0.678571 | 0.626946 | 0.821429 | 0.750000 | 0.821429 | 0.784080 |
| 5 8   | 0.857143 | 0.797619 | 0.857143 | 0.825754 | 0.892857 | 0.851190 | 0.892857 | 0.870785 |
| 5 9   | 0.964286 | 0.946429 | 0.964286 | 0.954969 | 1.000000 | 1.000000 | 1.000000 | 1.000000 |
| 6 7   | 0.714286 | 0.625000 | 0.714286 | 0.666205 | 0.714286 | 0.642857 | 0.714286 | 0.675306 |
| 6 8   | 0.928571 | 0.892857 | 0.928571 | 0.909938 | 0.964286 | 0.946429 | 0.964286 | 0.954969 |
| 6 9   | 1.000000 | 1.000000 | 1.000000 | 1.000000 | 1.000000 | 1.000000 | 1.000000 | 1.000000 |
| 7 8   | 0.821429 | 0.732143 | 0.821429 | 0.768620 | 0.964286 | 0.946429 | 0.964286 | 0.954969 |
| 7 9   | 0.892857 | 0.857143 | 0.892857 | 0.874142 | 1.000000 | 1.000000 | 1.000000 | 1.000000 |
| 8 9   | 0.964286 | 0.946429 | 0.964286 | 0.954969 | 1.000000 | 1.000000 | 1.000000 | 1.000000 |
| 1 2 3 | 0.714286 | 0.625000 | 0.714286 | 0.666622 | 0.857143 | 0.821429 | 0.857143 | 0.838509 |
| 1 2 4 | 0.892857 | 0.875000 | 0.892857 | 0.883540 | 0.928571 | 0.892857 | 0.928571 | 0.909938 |
| 1 2 5 | 0.714286 | 0.595238 | 0.714286 | 0.649093 | 0.821429 | 0.750000 | 0.821429 | 0.784080 |
| 1 2 6 | 0.857143 | 0.821429 | 0.857143 | 0.838509 | 0.892857 | 0.839286 | 0.892857 | 0.864907 |
| 1 2 7 | 0.678571 | 0.613095 | 0.678571 | 0.643663 | 0.714286 | 0.636905 | 0.714286 | 0.673141 |
| 1 2 8 | 0.821429 | 0.750000 | 0.821429 | 0.784080 | 0.964286 | 0.946429 | 0.964286 | 0.954969 |

|       |          |          |          |          |          |          |          |          |
|-------|----------|----------|----------|----------|----------|----------|----------|----------|
| 1 2 9 | 0.821429 | 0.803571 | 0.821429 | 0.812112 | 1.000000 | 1.000000 | 1.000000 | 1.000000 |
| 1 3 4 | 0.964286 | 0.946429 | 0.964286 | 0.954969 | 1.000000 | 1.000000 | 1.000000 | 1.000000 |
| 1 3 5 | 0.857143 | 0.797619 | 0.857143 | 0.825754 | 0.928571 | 0.892857 | 0.928571 | 0.909938 |
| 1 3 6 | 0.964286 | 0.946429 | 0.964286 | 0.954969 | 1.000000 | 1.000000 | 1.000000 | 1.000000 |
| 1 3 7 | 0.821429 | 0.750000 | 0.821429 | 0.784080 | 0.821429 | 0.767857 | 0.821429 | 0.793478 |
| 1 3 8 | 1.000000 | 1.000000 | 1.000000 | 1.000000 | 1.000000 | 1.000000 | 1.000000 | 1.000000 |
| 1 3 9 | 0.964286 | 0.946429 | 0.964286 | 0.954969 | 1.000000 | 1.000000 | 1.000000 | 1.000000 |
| 1 4 5 | 0.964286 | 0.946429 | 0.964286 | 0.954969 | 0.928571 | 0.910714 | 0.928571 | 0.919173 |
| 1 4 6 | 0.964286 | 0.946429 | 0.964286 | 0.954969 | 0.928571 | 0.892857 | 0.928571 | 0.909938 |
| 1 4 7 | 0.928571 | 0.892857 | 0.928571 | 0.909938 | 0.964286 | 0.946429 | 0.964286 | 0.954969 |
| 1 4 8 | 1.000000 | 1.000000 | 1.000000 | 1.000000 | 1.000000 | 1.000000 | 1.000000 | 1.000000 |
| 1 4 9 | 0.964286 | 0.946429 | 0.964286 | 0.954969 | 1.000000 | 1.000000 | 1.000000 | 1.000000 |
| 1 5 6 | 0.928571 | 0.892857 | 0.928571 | 0.909938 | 0.928571 | 0.892857 | 0.928571 | 0.909938 |
| 1 5 7 | 0.892857 | 0.851190 | 0.892857 | 0.870785 | 0.892857 | 0.851190 | 0.892857 | 0.870785 |
| 1 5 8 | 0.892857 | 0.839286 | 0.892857 | 0.864907 | 0.964286 | 0.946429 | 0.964286 | 0.954969 |
| 1 5 9 | 1.000000 | 1.000000 | 1.000000 | 1.000000 | 1.000000 | 1.000000 | 1.000000 | 1.000000 |
| 1 6 7 | 0.928571 | 0.892857 | 0.928571 | 0.909938 | 0.928571 | 0.892857 | 0.928571 | 0.909938 |
| 1 6 8 | 0.964286 | 0.946429 | 0.964286 | 0.954969 | 0.964286 | 0.946429 | 0.964286 | 0.954969 |
| 1 6 9 | 0.964286 | 0.946429 | 0.964286 | 0.954969 | 1.000000 | 1.000000 | 1.000000 | 1.000000 |
| 1 7 8 | 0.964286 | 0.946429 | 0.964286 | 0.954969 | 1.000000 | 1.000000 | 1.000000 | 1.000000 |
| 1 7 9 | 0.928571 | 0.892857 | 0.928571 | 0.909938 | 1.000000 | 1.000000 | 1.000000 | 1.000000 |
| 1 8 9 | 0.964286 | 0.946429 | 0.964286 | 0.954969 | 1.000000 | 1.000000 | 1.000000 | 1.000000 |
| 2 3 4 | 0.714286 | 0.607143 | 0.714286 | 0.655763 | 1.000000 | 1.000000 | 1.000000 | 1.000000 |
| 2 3 5 | 0.642857 | 0.517857 | 0.642857 | 0.572549 | 0.857143 | 0.821429 | 0.857143 | 0.838509 |
| 2 3 6 | 0.785714 | 0.714286 | 0.785714 | 0.747032 | 1.000000 | 1.000000 | 1.000000 | 1.000000 |
| 2 3 7 | 0.714286 | 0.625000 | 0.714286 | 0.666622 | 0.714286 | 0.714286 | 0.714286 | 0.714286 |
| 2 3 8 | 0.750000 | 0.642857 | 0.750000 | 0.691117 | 1.000000 | 1.000000 | 1.000000 | 1.000000 |
| 2 3 9 | 0.821429 | 0.767857 | 0.821429 | 0.792063 | 1.000000 | 1.000000 | 1.000000 | 1.000000 |
| 2 4 5 | 0.607143 | 0.508929 | 0.607143 | 0.553476 | 0.642857 | 0.529762 | 0.642857 | 0.580664 |
| 2 4 6 | 0.607143 | 0.502976 | 0.607143 | 0.550012 | 0.607143 | 0.511905 | 0.607143 | 0.552022 |
| 2 4 7 | 0.750000 | 0.714286 | 0.750000 | 0.731159 | 0.714286 | 0.625000 | 0.714286 | 0.666205 |
| 2 4 8 | 0.750000 | 0.666667 | 0.750000 | 0.704417 | 0.928571 | 0.892857 | 0.928571 | 0.909938 |

|       |          |          |          |          |          |          |          |          |
|-------|----------|----------|----------|----------|----------|----------|----------|----------|
| 2 4 9 | 0.714286 | 0.625000 | 0.714286 | 0.664512 | 1.000000 | 1.000000 | 1.000000 | 1.000000 |
| 2 5 6 | 0.607143 | 0.508929 | 0.607143 | 0.553476 | 0.571429 | 0.467262 | 0.571429 | 0.513212 |
| 2 5 7 | 0.535714 | 0.446429 | 0.535714 | 0.487013 | 0.714286 | 0.660714 | 0.714286 | 0.685128 |
| 2 5 8 | 0.607143 | 0.476190 | 0.607143 | 0.533498 | 0.857143 | 0.797619 | 0.857143 | 0.824546 |
| 2 5 9 | 0.714286 | 0.607143 | 0.714286 | 0.655763 | 1.000000 | 1.000000 | 1.000000 | 1.000000 |
| 2 6 7 | 0.607143 | 0.547619 | 0.607143 | 0.575331 | 0.607143 | 0.547619 | 0.607143 | 0.574546 |
| 2 6 8 | 0.714286 | 0.619048 | 0.714286 | 0.662849 | 0.892857 | 0.851190 | 0.892857 | 0.870785 |
| 2 6 9 | 0.750000 | 0.660714 | 0.750000 | 0.702001 | 1.000000 | 1.000000 | 1.000000 | 1.000000 |
| 2 7 8 | 0.642857 | 0.553571 | 0.642857 | 0.593055 | 0.928571 | 0.904762 | 0.928571 | 0.915816 |
| 2 7 9 | 0.821429 | 0.785714 | 0.821429 | 0.802713 | 1.000000 | 1.000000 | 1.000000 | 1.000000 |
| 2 8 9 | 0.892857 | 0.839286 | 0.892857 | 0.863699 | 1.000000 | 1.000000 | 1.000000 | 1.000000 |
| 3 4 5 | 0.964286 | 0.946429 | 0.964286 | 0.954969 | 1.000000 | 1.000000 | 1.000000 | 1.000000 |
| 3 4 6 | 0.964286 | 0.946429 | 0.964286 | 0.954969 | 1.000000 | 1.000000 | 1.000000 | 1.000000 |
| 3 4 7 | 0.928571 | 0.892857 | 0.928571 | 0.909938 | 1.000000 | 1.000000 | 1.000000 | 1.000000 |
| 3 4 8 | 1.000000 | 1.000000 | 1.000000 | 1.000000 | 1.000000 | 1.000000 | 1.000000 | 1.000000 |
| 3 4 9 | 0.964286 | 0.946429 | 0.964286 | 0.954969 | 1.000000 | 1.000000 | 1.000000 | 1.000000 |
| 3 5 6 | 1.000000 | 1.000000 | 1.000000 | 1.000000 | 1.000000 | 1.000000 | 1.000000 | 1.000000 |
| 3 5 7 | 0.892857 | 0.839286 | 0.892857 | 0.864907 | 0.892857 | 0.875000 | 0.892857 | 0.883540 |
| 3 5 8 | 0.928571 | 0.892857 | 0.928571 | 0.909938 | 1.000000 | 1.000000 | 1.000000 | 1.000000 |
| 3 5 9 | 1.000000 | 1.000000 | 1.000000 | 1.000000 | 1.000000 | 1.000000 | 1.000000 | 1.000000 |
| 3 6 7 | 0.964286 | 0.946429 | 0.964286 | 0.954969 | 1.000000 | 1.000000 | 1.000000 | 1.000000 |
| 3 6 8 | 1.000000 | 1.000000 | 1.000000 | 1.000000 | 1.000000 | 1.000000 | 1.000000 | 1.000000 |
| 3 6 9 | 1.000000 | 1.000000 | 1.000000 | 1.000000 | 1.000000 | 1.000000 | 1.000000 | 1.000000 |
| 3 7 8 | 0.928571 | 0.892857 | 0.928571 | 0.909938 | 1.000000 | 1.000000 | 1.000000 | 1.000000 |
| 3 7 9 | 0.964286 | 0.946429 | 0.964286 | 0.954969 | 1.000000 | 1.000000 | 1.000000 | 1.000000 |
| 3 8 9 | 1.000000 | 1.000000 | 1.000000 | 1.000000 | 1.000000 | 1.000000 | 1.000000 | 1.000000 |
| 4 5 6 | 0.678571 | 0.583333 | 0.678571 | 0.626903 | 0.750000 | 0.654762 | 0.750000 | 0.698688 |
| 4 5 7 | 0.750000 | 0.696429 | 0.750000 | 0.721843 | 0.821429 | 0.732143 | 0.821429 | 0.773637 |
| 4 5 8 | 0.892857 | 0.857143 | 0.892857 | 0.874142 | 0.892857 | 0.839286 | 0.892857 | 0.864907 |
| 4 5 9 | 0.785714 | 0.714286 | 0.785714 | 0.748240 | 1.000000 | 1.000000 | 1.000000 | 1.000000 |
| 4 6 7 | 0.821429 | 0.732143 | 0.821429 | 0.773637 | 0.750000 | 0.660714 | 0.750000 | 0.701001 |
| 4 6 8 | 0.892857 | 0.857143 | 0.892857 | 0.874142 | 0.964286 | 0.946429 | 0.964286 | 0.954969 |

|         |          |          |          |          |          |          |          |          |
|---------|----------|----------|----------|----------|----------|----------|----------|----------|
| 4 6 9   | 0.821429 | 0.732143 | 0.821429 | 0.773637 | 1.000000 | 1.000000 | 1.000000 | 1.000000 |
| 4 7 8   | 0.928571 | 0.892857 | 0.928571 | 0.909938 | 0.964286 | 0.946429 | 0.964286 | 0.954969 |
| 4 7 9   | 0.785714 | 0.696429 | 0.785714 | 0.737841 | 1.000000 | 1.000000 | 1.000000 | 1.000000 |
| 4 8 9   | 1.000000 | 1.000000 | 1.000000 | 1.000000 | 1.000000 | 1.000000 | 1.000000 | 1.000000 |
| 5 6 7   | 0.785714 | 0.714286 | 0.785714 | 0.747239 | 0.750000 | 0.672619 | 0.750000 | 0.708087 |
| 5 6 8   | 0.892857 | 0.839286 | 0.892857 | 0.864907 | 0.928571 | 0.892857 | 0.928571 | 0.909938 |
| 5 6 9   | 0.964286 | 0.946429 | 0.964286 | 0.954969 | 1.000000 | 1.000000 | 1.000000 | 1.000000 |
| 5 7 8   | 0.857143 | 0.785714 | 0.857143 | 0.818668 | 0.964286 | 0.946429 | 0.964286 | 0.954969 |
| 5 7 9   | 0.892857 | 0.839286 | 0.892857 | 0.864907 | 1.000000 | 1.000000 | 1.000000 | 1.000000 |
| 5 8 9   | 0.964286 | 0.946429 | 0.964286 | 0.954969 | 1.000000 | 1.000000 | 1.000000 | 1.000000 |
| 6 7 8   | 0.857143 | 0.785714 | 0.857143 | 0.817460 | 0.964286 | 0.946429 | 0.964286 | 0.954969 |
| 6 7 9   | 0.928571 | 0.892857 | 0.928571 | 0.908730 | 1.000000 | 1.000000 | 1.000000 | 1.000000 |
| 6 8 9   | 1.000000 | 1.000000 | 1.000000 | 1.000000 | 1.000000 | 1.000000 | 1.000000 | 1.000000 |
| 7 8 9   | 0.964286 | 0.946429 | 0.964286 | 0.954969 | 1.000000 | 1.000000 | 1.000000 | 1.000000 |
| 1 2 3 4 | 0.892857 | 0.875000 | 0.892857 | 0.883540 | 1.000000 | 1.000000 | 1.000000 | 1.000000 |
| 1 2 3 5 | 0.714286 | 0.625000 | 0.714286 | 0.666622 | 0.857143 | 0.785714 | 0.857143 | 0.819876 |
| 1 2 3 6 | 0.964286 | 0.946429 | 0.964286 | 0.954969 | 1.000000 | 1.000000 | 1.000000 | 1.000000 |
| 1 2 3 7 | 0.714286 | 0.625000 | 0.714286 | 0.666622 | 0.821429 | 0.767857 | 0.821429 | 0.793478 |
| 1 2 3 8 | 0.857143 | 0.785714 | 0.857143 | 0.819876 | 1.000000 | 1.000000 | 1.000000 | 1.000000 |
| 1 2 3 9 | 0.892857 | 0.875000 | 0.892857 | 0.883540 | 1.000000 | 1.000000 | 1.000000 | 1.000000 |
| 1 2 4 5 | 0.857143 | 0.833333 | 0.857143 | 0.844388 | 0.928571 | 0.892857 | 0.928571 | 0.909938 |
| 1 2 4 6 | 0.892857 | 0.875000 | 0.892857 | 0.883540 | 0.892857 | 0.839286 | 0.892857 | 0.864907 |
| 1 2 4 7 | 0.857143 | 0.821429 | 0.857143 | 0.838509 | 0.928571 | 0.892857 | 0.928571 | 0.909938 |
| 1 2 4 8 | 0.928571 | 0.892857 | 0.928571 | 0.909938 | 1.000000 | 1.000000 | 1.000000 | 1.000000 |
| 1 2 4 9 | 0.892857 | 0.875000 | 0.892857 | 0.883540 | 1.000000 | 1.000000 | 1.000000 | 1.000000 |
| 1 2 5 6 | 0.857143 | 0.833333 | 0.857143 | 0.844388 | 0.892857 | 0.839286 | 0.892857 | 0.864907 |
| 1 2 5 7 | 0.714286 | 0.625000 | 0.714286 | 0.666622 | 0.857143 | 0.803571 | 0.857143 | 0.829111 |
| 1 2 5 8 | 0.821429 | 0.750000 | 0.821429 | 0.784080 | 0.928571 | 0.892857 | 0.928571 | 0.909938 |
| 1 2 5 9 | 0.892857 | 0.875000 | 0.892857 | 0.883540 | 1.000000 | 1.000000 | 1.000000 | 1.000000 |
| 1 2 6 7 | 0.857143 | 0.821429 | 0.857143 | 0.838509 | 0.892857 | 0.839286 | 0.892857 | 0.864907 |
| 1 2 6 8 | 0.928571 | 0.892857 | 0.928571 | 0.909938 | 0.964286 | 0.946429 | 0.964286 | 0.954969 |
| 1 2 6 9 | 0.928571 | 0.892857 | 0.928571 | 0.909938 | 1.000000 | 1.000000 | 1.000000 | 1.000000 |

|      |          |          |          |          |          |          |          |          |
|------|----------|----------|----------|----------|----------|----------|----------|----------|
| 1278 | 0.785714 | 0.714286 | 0.785714 | 0.748284 | 0.964286 | 0.946429 | 0.964286 | 0.954969 |
| 1279 | 0.857143 | 0.821429 | 0.857143 | 0.838509 | 1.000000 | 1.000000 | 1.000000 | 1.000000 |
| 1289 | 0.964286 | 0.946429 | 0.964286 | 0.954969 | 1.000000 | 1.000000 | 1.000000 | 1.000000 |
| 1345 | 0.964286 | 0.946429 | 0.964286 | 0.954969 | 1.000000 | 1.000000 | 1.000000 | 1.000000 |
| 1346 | 0.964286 | 0.946429 | 0.964286 | 0.954969 | 1.000000 | 1.000000 | 1.000000 | 1.000000 |
| 1347 | 0.928571 | 0.892857 | 0.928571 | 0.909938 | 1.000000 | 1.000000 | 1.000000 | 1.000000 |
| 1348 | 1.000000 | 1.000000 | 1.000000 | 1.000000 | 1.000000 | 1.000000 | 1.000000 | 1.000000 |
| 1349 | 0.964286 | 0.946429 | 0.964286 | 0.954969 | 1.000000 | 1.000000 | 1.000000 | 1.000000 |
| 1356 | 0.964286 | 0.946429 | 0.964286 | 0.954969 | 1.000000 | 1.000000 | 1.000000 | 1.000000 |
| 1357 | 0.857143 | 0.797619 | 0.857143 | 0.825754 | 0.928571 | 0.892857 | 0.928571 | 0.909938 |
| 1358 | 0.964286 | 0.946429 | 0.964286 | 0.954969 | 1.000000 | 1.000000 | 1.000000 | 1.000000 |
| 1359 | 0.964286 | 0.946429 | 0.964286 | 0.954969 | 1.000000 | 1.000000 | 1.000000 | 1.000000 |
| 1367 | 0.928571 | 0.892857 | 0.928571 | 0.909938 | 1.000000 | 1.000000 | 1.000000 | 1.000000 |
| 1368 | 1.000000 | 1.000000 | 1.000000 | 1.000000 | 1.000000 | 1.000000 | 1.000000 | 1.000000 |
| 1369 | 0.964286 | 0.946429 | 0.964286 | 0.954969 | 1.000000 | 1.000000 | 1.000000 | 1.000000 |
| 1378 | 0.964286 | 0.946429 | 0.964286 | 0.954969 | 1.000000 | 1.000000 | 1.000000 | 1.000000 |
| 1379 | 0.928571 | 0.892857 | 0.928571 | 0.909938 | 1.000000 | 1.000000 | 1.000000 | 1.000000 |
| 1389 | 1.000000 | 1.000000 | 1.000000 | 1.000000 | 1.000000 | 1.000000 | 1.000000 | 1.000000 |
| 1456 | 0.964286 | 0.946429 | 0.964286 | 0.954969 | 0.892857 | 0.857143 | 0.892857 | 0.874142 |
| 1457 | 0.928571 | 0.892857 | 0.928571 | 0.909938 | 0.964286 | 0.946429 | 0.964286 | 0.954969 |
| 1458 | 0.964286 | 0.946429 | 0.964286 | 0.954969 | 0.964286 | 0.946429 | 0.964286 | 0.954969 |
| 1459 | 0.964286 | 0.946429 | 0.964286 | 0.954969 | 1.000000 | 1.000000 | 1.000000 | 1.000000 |
| 1467 | 0.928571 | 0.892857 | 0.928571 | 0.909938 | 0.928571 | 0.892857 | 0.928571 | 0.909938 |
| 1468 | 1.000000 | 1.000000 | 1.000000 | 1.000000 | 0.964286 | 0.946429 | 0.964286 | 0.954969 |
| 1469 | 0.964286 | 0.946429 | 0.964286 | 0.954969 | 1.000000 | 1.000000 | 1.000000 | 1.000000 |
| 1478 | 0.964286 | 0.946429 | 0.964286 | 0.954969 | 1.000000 | 1.000000 | 1.000000 | 1.000000 |
| 1479 | 0.928571 | 0.892857 | 0.928571 | 0.909938 | 1.000000 | 1.000000 | 1.000000 | 1.000000 |
| 1489 | 1.000000 | 1.000000 | 1.000000 | 1.000000 | 1.000000 | 1.000000 | 1.000000 | 1.000000 |
| 1567 | 0.928571 | 0.892857 | 0.928571 | 0.909938 | 1.000000 | 1.000000 | 1.000000 | 1.000000 |
| 1568 | 0.964286 | 0.946429 | 0.964286 | 0.954969 | 0.928571 | 0.892857 | 0.928571 | 0.909938 |
| 1569 | 0.964286 | 0.946429 | 0.964286 | 0.954969 | 1.000000 | 1.000000 | 1.000000 | 1.000000 |
| 1578 | 0.928571 | 0.892857 | 0.928571 | 0.909938 | 0.964286 | 0.946429 | 0.964286 | 0.954969 |



|      |          |          |          |          |          |          |          |          |
|------|----------|----------|----------|----------|----------|----------|----------|----------|
| 1579 | 0.928571 | 0.892857 | 0.928571 | 0.909938 | 1.000000 | 1.000000 | 1.000000 | 1.000000 |
| 1589 | 0.964286 | 0.946429 | 0.964286 | 0.954969 | 1.000000 | 1.000000 | 1.000000 | 1.000000 |
| 1678 | 0.964286 | 0.946429 | 0.964286 | 0.954969 | 0.964286 | 0.946429 | 0.964286 | 0.954969 |
| 1679 | 0.928571 | 0.892857 | 0.928571 | 0.909938 | 1.000000 | 1.000000 | 1.000000 | 1.000000 |
| 1689 | 0.964286 | 0.946429 | 0.964286 | 0.954969 | 1.000000 | 1.000000 | 1.000000 | 1.000000 |
| 1789 | 0.964286 | 0.946429 | 0.964286 | 0.954969 | 1.000000 | 1.000000 | 1.000000 | 1.000000 |
| 2345 | 0.785714 | 0.714286 | 0.785714 | 0.747032 | 1.000000 | 1.000000 | 1.000000 | 1.000000 |
| 2346 | 0.785714 | 0.714286 | 0.785714 | 0.747032 | 1.000000 | 1.000000 | 1.000000 | 1.000000 |
| 2347 | 0.857143 | 0.821429 | 0.857143 | 0.838509 | 1.000000 | 1.000000 | 1.000000 | 1.000000 |
| 2348 | 0.928571 | 0.892857 | 0.928571 | 0.909938 | 1.000000 | 1.000000 | 1.000000 | 1.000000 |
| 2349 | 0.821429 | 0.767857 | 0.821429 | 0.793271 | 1.000000 | 1.000000 | 1.000000 | 1.000000 |
| 2356 | 0.785714 | 0.714286 | 0.785714 | 0.747032 | 1.000000 | 1.000000 | 1.000000 | 1.000000 |
| 2357 | 0.714286 | 0.625000 | 0.714286 | 0.666622 | 0.892857 | 0.875000 | 0.892857 | 0.883540 |
| 2358 | 0.750000 | 0.642857 | 0.750000 | 0.691117 | 1.000000 | 1.000000 | 1.000000 | 1.000000 |
| 2359 | 0.785714 | 0.714286 | 0.785714 | 0.747032 | 1.000000 | 1.000000 | 1.000000 | 1.000000 |
| 2367 | 0.928571 | 0.892857 | 0.928571 | 0.909938 | 1.000000 | 1.000000 | 1.000000 | 1.000000 |
| 2368 | 0.892857 | 0.839286 | 0.892857 | 0.863699 | 1.000000 | 1.000000 | 1.000000 | 1.000000 |
| 2369 | 0.857143 | 0.785714 | 0.857143 | 0.817460 | 1.000000 | 1.000000 | 1.000000 | 1.000000 |
| 2378 | 0.785714 | 0.714286 | 0.785714 | 0.748284 | 1.000000 | 1.000000 | 1.000000 | 1.000000 |
| 2379 | 0.892857 | 0.875000 | 0.892857 | 0.883540 | 1.000000 | 1.000000 | 1.000000 | 1.000000 |
| 2389 | 1.000000 | 1.000000 | 1.000000 | 1.000000 | 1.000000 | 1.000000 | 1.000000 | 1.000000 |
| 2456 | 0.642857 | 0.556548 | 0.642857 | 0.596251 | 0.678571 | 0.583333 | 0.678571 | 0.626946 |
| 2457 | 0.750000 | 0.714286 | 0.750000 | 0.731203 | 0.714286 | 0.642857 | 0.714286 | 0.675729 |
| 2458 | 0.750000 | 0.666667 | 0.750000 | 0.704417 | 0.821429 | 0.744048 | 0.821429 | 0.780723 |
| 2459 | 0.714286 | 0.642857 | 0.714286 | 0.675397 | 1.000000 | 1.000000 | 1.000000 | 1.000000 |
| 2467 | 0.785714 | 0.750000 | 0.785714 | 0.766999 | 0.678571 | 0.571429 | 0.678571 | 0.619967 |
| 2468 | 0.821429 | 0.761905 | 0.821429 | 0.789808 | 0.892857 | 0.839286 | 0.892857 | 0.864907 |
| 2469 | 0.750000 | 0.660714 | 0.750000 | 0.700794 | 1.000000 | 1.000000 | 1.000000 | 1.000000 |
| 2478 | 0.857143 | 0.797619 | 0.857143 | 0.824546 | 0.964286 | 0.946429 | 0.964286 | 0.954969 |
| 2479 | 0.821429 | 0.785714 | 0.821429 | 0.802713 | 1.000000 | 1.000000 | 1.000000 | 1.000000 |
| 2489 | 0.892857 | 0.839286 | 0.892857 | 0.864907 | 1.000000 | 1.000000 | 1.000000 | 1.000000 |
| 2567 | 0.642857 | 0.601190 | 0.642857 | 0.620785 | 0.678571 | 0.619048 | 0.678571 | 0.645975 |

|         |          |          |          |          |          |          |          |          |
|---------|----------|----------|----------|----------|----------|----------|----------|----------|
| 2 5 6 8 | 0.750000 | 0.654762 | 0.750000 | 0.698688 | 0.857143 | 0.797619 | 0.857143 | 0.825754 |
| 2 5 6 9 | 0.714286 | 0.607143 | 0.714286 | 0.655763 | 1.000000 | 1.000000 | 1.000000 | 1.000000 |
| 2 5 7 8 | 0.678571 | 0.607143 | 0.678571 | 0.640674 | 0.892857 | 0.857143 | 0.892857 | 0.874142 |
| 2 5 7 9 | 0.857143 | 0.821429 | 0.857143 | 0.838509 | 1.000000 | 1.000000 | 1.000000 | 1.000000 |
| 2 5 8 9 | 0.892857 | 0.839286 | 0.892857 | 0.863699 | 1.000000 | 1.000000 | 1.000000 | 1.000000 |
| 2 6 7 8 | 0.785714 | 0.761905 | 0.785714 | 0.772959 | 0.964286 | 0.946429 | 0.964286 | 0.954969 |
| 2 6 7 9 | 0.892857 | 0.875000 | 0.892857 | 0.883540 | 1.000000 | 1.000000 | 1.000000 | 1.000000 |
| 2 6 8 9 | 0.892857 | 0.839286 | 0.892857 | 0.863699 | 1.000000 | 1.000000 | 1.000000 | 1.000000 |
| 2 7 8 9 | 0.928571 | 0.892857 | 0.928571 | 0.909938 | 1.000000 | 1.000000 | 1.000000 | 1.000000 |
| 3 4 5 6 | 0.964286 | 0.946429 | 0.964286 | 0.954969 | 1.000000 | 1.000000 | 1.000000 | 1.000000 |
| 3 4 5 7 | 0.928571 | 0.892857 | 0.928571 | 0.909938 | 1.000000 | 1.000000 | 1.000000 | 1.000000 |
| 3 4 5 8 | 0.964286 | 0.946429 | 0.964286 | 0.954969 | 1.000000 | 1.000000 | 1.000000 | 1.000000 |
| 3 4 5 9 | 0.964286 | 0.946429 | 0.964286 | 0.954969 | 1.000000 | 1.000000 | 1.000000 | 1.000000 |
| 3 4 6 7 | 0.928571 | 0.892857 | 0.928571 | 0.909938 | 1.000000 | 1.000000 | 1.000000 | 1.000000 |
| 3 4 6 8 | 1.000000 | 1.000000 | 1.000000 | 1.000000 | 1.000000 | 1.000000 | 1.000000 | 1.000000 |
| 3 4 6 9 | 0.964286 | 0.946429 | 0.964286 | 0.954969 | 1.000000 | 1.000000 | 1.000000 | 1.000000 |
| 3 4 7 8 | 1.000000 | 1.000000 | 1.000000 | 1.000000 | 1.000000 | 1.000000 | 1.000000 | 1.000000 |
| 3 4 7 9 | 0.928571 | 0.892857 | 0.928571 | 0.909938 | 1.000000 | 1.000000 | 1.000000 | 1.000000 |
| 3 4 8 9 | 1.000000 | 1.000000 | 1.000000 | 1.000000 | 1.000000 | 1.000000 | 1.000000 | 1.000000 |
| 3 5 6 7 | 0.964286 | 0.946429 | 0.964286 | 0.954969 | 1.000000 | 1.000000 | 1.000000 | 1.000000 |
| 3 5 6 8 | 1.000000 | 1.000000 | 1.000000 | 1.000000 | 1.000000 | 1.000000 | 1.000000 | 1.000000 |
| 3 5 6 9 | 1.000000 | 1.000000 | 1.000000 | 1.000000 | 1.000000 | 1.000000 | 1.000000 | 1.000000 |
| 3 5 7 8 | 0.892857 | 0.839286 | 0.892857 | 0.864907 | 1.000000 | 1.000000 | 1.000000 | 1.000000 |
| 3 5 7 9 | 0.964286 | 0.946429 | 0.964286 | 0.954969 | 1.000000 | 1.000000 | 1.000000 | 1.000000 |
| 3 5 8 9 | 1.000000 | 1.000000 | 1.000000 | 1.000000 | 1.000000 | 1.000000 | 1.000000 | 1.000000 |
| 3 6 7 8 | 0.964286 | 0.946429 | 0.964286 | 0.954969 | 1.000000 | 1.000000 | 1.000000 | 1.000000 |
| 3 6 7 9 | 0.964286 | 0.946429 | 0.964286 | 0.954969 | 1.000000 | 1.000000 | 1.000000 | 1.000000 |
| 3 6 8 9 | 1.000000 | 1.000000 | 1.000000 | 1.000000 | 1.000000 | 1.000000 | 1.000000 | 1.000000 |
| 3 7 8 9 | 0.964286 | 0.946429 | 0.964286 | 0.954969 | 1.000000 | 1.000000 | 1.000000 | 1.000000 |
| 4 5 6 7 | 0.785714 | 0.714286 | 0.785714 | 0.747239 | 0.821429 | 0.732143 | 0.821429 | 0.773637 |
| 4 5 6 8 | 0.892857 | 0.857143 | 0.892857 | 0.874142 | 0.892857 | 0.839286 | 0.892857 | 0.864907 |
| 4 5 6 9 | 0.785714 | 0.714286 | 0.785714 | 0.748240 | 1.000000 | 1.000000 | 1.000000 | 1.000000 |

|           |          |          |          |          |          |          |          |          |
|-----------|----------|----------|----------|----------|----------|----------|----------|----------|
| 4 5 7 8   | 0.928571 | 0.892857 | 0.928571 | 0.909938 | 0.964286 | 0.946429 | 0.964286 | 0.954969 |
| 4 5 7 9   | 0.821429 | 0.767857 | 0.821429 | 0.793478 | 1.000000 | 1.000000 | 1.000000 | 1.000000 |
| 4 5 8 9   | 1.000000 | 1.000000 | 1.000000 | 1.000000 | 1.000000 | 1.000000 | 1.000000 | 1.000000 |
| 4 6 7 8   | 0.928571 | 0.892857 | 0.928571 | 0.909938 | 0.964286 | 0.946429 | 0.964286 | 0.954969 |
| 4 6 7 9   | 0.857143 | 0.785714 | 0.857143 | 0.818668 | 1.000000 | 1.000000 | 1.000000 | 1.000000 |
| 4 6 8 9   | 1.000000 | 1.000000 | 1.000000 | 1.000000 | 1.000000 | 1.000000 | 1.000000 | 1.000000 |
| 4 7 8 9   | 1.000000 | 1.000000 | 1.000000 | 1.000000 | 1.000000 | 1.000000 | 1.000000 | 1.000000 |
| 5 6 7 8   | 0.928571 | 0.892857 | 0.928571 | 0.909938 | 0.964286 | 0.946429 | 0.964286 | 0.954969 |
| 5 6 7 9   | 0.892857 | 0.839286 | 0.892857 | 0.864907 | 1.000000 | 1.000000 | 1.000000 | 1.000000 |
| 5 6 8 9   | 0.964286 | 0.946429 | 0.964286 | 0.954969 | 1.000000 | 1.000000 | 1.000000 | 1.000000 |
| 5 7 8 9   | 0.964286 | 0.946429 | 0.964286 | 0.954969 | 1.000000 | 1.000000 | 1.000000 | 1.000000 |
| 6 7 8 9   | 0.964286 | 0.946429 | 0.964286 | 0.954969 | 1.000000 | 1.000000 | 1.000000 | 1.000000 |
| 1 2 3 4 5 | 0.892857 | 0.875000 | 0.892857 | 0.883540 | 1.000000 | 1.000000 | 1.000000 | 1.000000 |
| 1 2 3 4 6 | 0.892857 | 0.875000 | 0.892857 | 0.883540 | 1.000000 | 1.000000 | 1.000000 | 1.000000 |
| 1 2 3 4 7 | 0.857143 | 0.821429 | 0.857143 | 0.838509 | 1.000000 | 1.000000 | 1.000000 | 1.000000 |
| 1 2 3 4 8 | 1.000000 | 1.000000 | 1.000000 | 1.000000 | 1.000000 | 1.000000 | 1.000000 | 1.000000 |
| 1 2 3 4 9 | 0.892857 | 0.875000 | 0.892857 | 0.883540 | 1.000000 | 1.000000 | 1.000000 | 1.000000 |
| 1 2 3 5 6 | 0.928571 | 0.928571 | 0.928571 | 0.928571 | 1.000000 | 1.000000 | 1.000000 | 1.000000 |
| 1 2 3 5 7 | 0.714286 | 0.625000 | 0.714286 | 0.666622 | 0.892857 | 0.839286 | 0.892857 | 0.864907 |
| 1 2 3 5 8 | 0.857143 | 0.785714 | 0.857143 | 0.819876 | 1.000000 | 1.000000 | 1.000000 | 1.000000 |
| 1 2 3 5 9 | 0.928571 | 0.928571 | 0.928571 | 0.928571 | 1.000000 | 1.000000 | 1.000000 | 1.000000 |
| 1 2 3 6 7 | 0.892857 | 0.839286 | 0.892857 | 0.864907 | 1.000000 | 1.000000 | 1.000000 | 1.000000 |
| 1 2 3 6 8 | 0.964286 | 0.946429 | 0.964286 | 0.954969 | 1.000000 | 1.000000 | 1.000000 | 1.000000 |
| 1 2 3 6 9 | 1.000000 | 1.000000 | 1.000000 | 1.000000 | 1.000000 | 1.000000 | 1.000000 | 1.000000 |
| 1 2 3 7 8 | 0.785714 | 0.714286 | 0.785714 | 0.748284 | 1.000000 | 1.000000 | 1.000000 | 1.000000 |
| 1 2 3 7 9 | 0.892857 | 0.875000 | 0.892857 | 0.883540 | 1.000000 | 1.000000 | 1.000000 | 1.000000 |
| 1 2 3 8 9 | 0.964286 | 0.946429 | 0.964286 | 0.954969 | 1.000000 | 1.000000 | 1.000000 | 1.000000 |
| 1 2 4 5 6 | 0.892857 | 0.875000 | 0.892857 | 0.883540 | 0.892857 | 0.839286 | 0.892857 | 0.864907 |
| 1 2 4 5 7 | 0.857143 | 0.821429 | 0.857143 | 0.838509 | 0.928571 | 0.892857 | 0.928571 | 0.909938 |
| 1 2 4 5 8 | 0.928571 | 0.892857 | 0.928571 | 0.909938 | 0.964286 | 0.946429 | 0.964286 | 0.954969 |
| 1 2 4 5 9 | 0.892857 | 0.875000 | 0.892857 | 0.883540 | 1.000000 | 1.000000 | 1.000000 | 1.000000 |
| 1 2 4 6 7 | 0.857143 | 0.821429 | 0.857143 | 0.838509 | 0.892857 | 0.839286 | 0.892857 | 0.864907 |

|           |          |          |          |          |          |          |          |          |
|-----------|----------|----------|----------|----------|----------|----------|----------|----------|
| 1 2 4 6 8 | 0.928571 | 0.892857 | 0.928571 | 0.909938 | 0.964286 | 0.946429 | 0.964286 | 0.954969 |
| 1 2 4 6 9 | 0.892857 | 0.875000 | 0.892857 | 0.883540 | 1.000000 | 1.000000 | 1.000000 | 1.000000 |
| 1 2 4 7 8 | 0.964286 | 0.946429 | 0.964286 | 0.954969 | 1.000000 | 1.000000 | 1.000000 | 1.000000 |
| 1 2 4 7 9 | 0.892857 | 0.839286 | 0.892857 | 0.864907 | 1.000000 | 1.000000 | 1.000000 | 1.000000 |
| 1 2 4 8 9 | 1.000000 | 1.000000 | 1.000000 | 1.000000 | 1.000000 | 1.000000 | 1.000000 | 1.000000 |
| 1 2 5 6 7 | 0.857143 | 0.821429 | 0.857143 | 0.838509 | 0.928571 | 0.892857 | 0.928571 | 0.909938 |
| 1 2 5 6 8 | 0.928571 | 0.892857 | 0.928571 | 0.909938 | 0.964286 | 0.946429 | 0.964286 | 0.954969 |
| 1 2 5 6 9 | 0.928571 | 0.928571 | 0.928571 | 0.928571 | 1.000000 | 1.000000 | 1.000000 | 1.000000 |
| 1 2 5 7 8 | 0.785714 | 0.714286 | 0.785714 | 0.748284 | 0.964286 | 0.946429 | 0.964286 | 0.954969 |
| 1 2 5 7 9 | 0.892857 | 0.875000 | 0.892857 | 0.883540 | 1.000000 | 1.000000 | 1.000000 | 1.000000 |
| 1 2 5 8 9 | 0.964286 | 0.946429 | 0.964286 | 0.954969 | 1.000000 | 1.000000 | 1.000000 | 1.000000 |
| 1 2 6 7 8 | 0.964286 | 0.946429 | 0.964286 | 0.954969 | 0.964286 | 0.946429 | 0.964286 | 0.954969 |
| 1 2 6 7 9 | 0.892857 | 0.875000 | 0.892857 | 0.883540 | 1.000000 | 1.000000 | 1.000000 | 1.000000 |
| 1 2 6 8 9 | 0.964286 | 0.946429 | 0.964286 | 0.954969 | 1.000000 | 1.000000 | 1.000000 | 1.000000 |
| 1 2 7 8 9 | 0.964286 | 0.946429 | 0.964286 | 0.954969 | 1.000000 | 1.000000 | 1.000000 | 1.000000 |
| 1 3 4 5 6 | 0.964286 | 0.946429 | 0.964286 | 0.954969 | 1.000000 | 1.000000 | 1.000000 | 1.000000 |
| 1 3 4 5 7 | 0.928571 | 0.892857 | 0.928571 | 0.909938 | 1.000000 | 1.000000 | 1.000000 | 1.000000 |
| 1 3 4 5 8 | 1.000000 | 1.000000 | 1.000000 | 1.000000 | 1.000000 | 1.000000 | 1.000000 | 1.000000 |
| 1 3 4 5 9 | 0.964286 | 0.946429 | 0.964286 | 0.954969 | 1.000000 | 1.000000 | 1.000000 | 1.000000 |
| 1 3 4 6 7 | 0.928571 | 0.892857 | 0.928571 | 0.909938 | 1.000000 | 1.000000 | 1.000000 | 1.000000 |
| 1 3 4 6 8 | 1.000000 | 1.000000 | 1.000000 | 1.000000 | 1.000000 | 1.000000 | 1.000000 | 1.000000 |
| 1 3 4 6 9 | 0.964286 | 0.946429 | 0.964286 | 0.954969 | 1.000000 | 1.000000 | 1.000000 | 1.000000 |
| 1 3 4 7 8 | 1.000000 | 1.000000 | 1.000000 | 1.000000 | 1.000000 | 1.000000 | 1.000000 | 1.000000 |
| 1 3 4 7 9 | 0.928571 | 0.892857 | 0.928571 | 0.909938 | 1.000000 | 1.000000 | 1.000000 | 1.000000 |
| 1 3 4 8 9 | 1.000000 | 1.000000 | 1.000000 | 1.000000 | 1.000000 | 1.000000 | 1.000000 | 1.000000 |
| 1 3 5 6 7 | 0.928571 | 0.892857 | 0.928571 | 0.909938 | 1.000000 | 1.000000 | 1.000000 | 1.000000 |
| 1 3 5 6 8 | 0.964286 | 0.946429 | 0.964286 | 0.954969 | 1.000000 | 1.000000 | 1.000000 | 1.000000 |
| 1 3 5 6 9 | 1.000000 | 1.000000 | 1.000000 | 1.000000 | 1.000000 | 1.000000 | 1.000000 | 1.000000 |
| 1 3 5 7 8 | 0.964286 | 0.946429 | 0.964286 | 0.954969 | 1.000000 | 1.000000 | 1.000000 | 1.000000 |
| 1 3 5 7 9 | 0.964286 | 0.946429 | 0.964286 | 0.954969 | 1.000000 | 1.000000 | 1.000000 | 1.000000 |
| 1 3 5 8 9 | 0.964286 | 0.946429 | 0.964286 | 0.954969 | 1.000000 | 1.000000 | 1.000000 | 1.000000 |
| 1 3 6 7 8 | 0.964286 | 0.946429 | 0.964286 | 0.954969 | 1.000000 | 1.000000 | 1.000000 | 1.000000 |

|       |          |          |          |          |          |          |          |          |
|-------|----------|----------|----------|----------|----------|----------|----------|----------|
| 13679 | 0.928571 | 0.892857 | 0.928571 | 0.909938 | 1.000000 | 1.000000 | 1.000000 | 1.000000 |
| 13689 | 1.000000 | 1.000000 | 1.000000 | 1.000000 | 1.000000 | 1.000000 | 1.000000 | 1.000000 |
| 13789 | 0.964286 | 0.946429 | 0.964286 | 0.954969 | 1.000000 | 1.000000 | 1.000000 | 1.000000 |
| 14567 | 0.928571 | 0.892857 | 0.928571 | 0.909938 | 0.964286 | 0.946429 | 0.964286 | 0.954969 |
| 14568 | 1.000000 | 1.000000 | 1.000000 | 1.000000 | 0.928571 | 0.892857 | 0.928571 | 0.909938 |
| 14569 | 0.964286 | 0.946429 | 0.964286 | 0.954969 | 1.000000 | 1.000000 | 1.000000 | 1.000000 |
| 14578 | 0.964286 | 0.946429 | 0.964286 | 0.954969 | 1.000000 | 1.000000 | 1.000000 | 1.000000 |
| 14579 | 0.928571 | 0.892857 | 0.928571 | 0.909938 | 1.000000 | 1.000000 | 1.000000 | 1.000000 |
| 14589 | 1.000000 | 1.000000 | 1.000000 | 1.000000 | 1.000000 | 1.000000 | 1.000000 | 1.000000 |
| 14678 | 0.964286 | 0.946429 | 0.964286 | 0.954969 | 0.964286 | 0.946429 | 0.964286 | 0.954969 |
| 14679 | 0.928571 | 0.892857 | 0.928571 | 0.909938 | 1.000000 | 1.000000 | 1.000000 | 1.000000 |
| 14689 | 1.000000 | 1.000000 | 1.000000 | 1.000000 | 1.000000 | 1.000000 | 1.000000 | 1.000000 |
| 14789 | 1.000000 | 1.000000 | 1.000000 | 1.000000 | 1.000000 | 1.000000 | 1.000000 | 1.000000 |
| 15678 | 0.964286 | 0.946429 | 0.964286 | 0.954969 | 1.000000 | 1.000000 | 1.000000 | 1.000000 |
| 15679 | 0.928571 | 0.892857 | 0.928571 | 0.909938 | 1.000000 | 1.000000 | 1.000000 | 1.000000 |
| 15689 | 0.964286 | 0.946429 | 0.964286 | 0.954969 | 1.000000 | 1.000000 | 1.000000 | 1.000000 |
| 15789 | 0.964286 | 0.946429 | 0.964286 | 0.954969 | 1.000000 | 1.000000 | 1.000000 | 1.000000 |
| 16789 | 0.964286 | 0.946429 | 0.964286 | 0.954969 | 1.000000 | 1.000000 | 1.000000 | 1.000000 |
| 23456 | 0.785714 | 0.714286 | 0.785714 | 0.747032 | 1.000000 | 1.000000 | 1.000000 | 1.000000 |
| 23457 | 0.892857 | 0.875000 | 0.892857 | 0.883540 | 1.000000 | 1.000000 | 1.000000 | 1.000000 |
| 23458 | 0.928571 | 0.892857 | 0.928571 | 0.909938 | 1.000000 | 1.000000 | 1.000000 | 1.000000 |
| 23459 | 0.821429 | 0.767857 | 0.821429 | 0.793271 | 1.000000 | 1.000000 | 1.000000 | 1.000000 |
| 23467 | 0.892857 | 0.839286 | 0.892857 | 0.864907 | 1.000000 | 1.000000 | 1.000000 | 1.000000 |
| 23468 | 0.928571 | 0.892857 | 0.928571 | 0.909938 | 1.000000 | 1.000000 | 1.000000 | 1.000000 |
| 23469 | 0.857143 | 0.821429 | 0.857143 | 0.838302 | 1.000000 | 1.000000 | 1.000000 | 1.000000 |
| 23478 | 0.964286 | 0.946429 | 0.964286 | 0.954969 | 1.000000 | 1.000000 | 1.000000 | 1.000000 |
| 23479 | 0.857143 | 0.821429 | 0.857143 | 0.838509 | 1.000000 | 1.000000 | 1.000000 | 1.000000 |
| 23489 | 0.928571 | 0.892857 | 0.928571 | 0.909938 | 1.000000 | 1.000000 | 1.000000 | 1.000000 |
| 23567 | 0.928571 | 0.892857 | 0.928571 | 0.909938 | 1.000000 | 1.000000 | 1.000000 | 1.000000 |
| 23568 | 0.892857 | 0.839286 | 0.892857 | 0.863699 | 1.000000 | 1.000000 | 1.000000 | 1.000000 |
| 23569 | 0.821429 | 0.767857 | 0.821429 | 0.792271 | 1.000000 | 1.000000 | 1.000000 | 1.000000 |
| 23578 | 0.785714 | 0.714286 | 0.785714 | 0.748284 | 1.000000 | 1.000000 | 1.000000 | 1.000000 |

|           |          |          |          |          |          |          |          |          |
|-----------|----------|----------|----------|----------|----------|----------|----------|----------|
| 2 3 5 7 9 | 0.857143 | 0.821429 | 0.857143 | 0.838509 | 1.000000 | 1.000000 | 1.000000 | 1.000000 |
| 2 3 5 8 9 | 0.964286 | 0.946429 | 0.964286 | 0.954969 | 1.000000 | 1.000000 | 1.000000 | 1.000000 |
| 2 3 6 7 8 | 0.928571 | 0.892857 | 0.928571 | 0.909938 | 1.000000 | 1.000000 | 1.000000 | 1.000000 |
| 2 3 6 7 9 | 0.892857 | 0.875000 | 0.892857 | 0.883540 | 1.000000 | 1.000000 | 1.000000 | 1.000000 |
| 2 3 6 8 9 | 1.000000 | 1.000000 | 1.000000 | 1.000000 | 1.000000 | 1.000000 | 1.000000 | 1.000000 |
| 2 3 7 8 9 | 0.964286 | 0.946429 | 0.964286 | 0.954969 | 1.000000 | 1.000000 | 1.000000 | 1.000000 |
| 2 4 5 6 7 | 0.750000 | 0.732143 | 0.750000 | 0.740602 | 0.714286 | 0.642857 | 0.714286 | 0.675729 |
| 2 4 5 6 8 | 0.750000 | 0.666667 | 0.750000 | 0.704417 | 0.821429 | 0.744048 | 0.821429 | 0.780723 |
| 2 4 5 6 9 | 0.750000 | 0.660714 | 0.750000 | 0.700794 | 1.000000 | 1.000000 | 1.000000 | 1.000000 |
| 2 4 5 7 8 | 0.857143 | 0.797619 | 0.857143 | 0.824546 | 0.892857 | 0.839286 | 0.892857 | 0.863699 |
| 2 4 5 7 9 | 0.857143 | 0.821429 | 0.857143 | 0.838509 | 1.000000 | 1.000000 | 1.000000 | 1.000000 |
| 2 4 5 8 9 | 0.928571 | 0.892857 | 0.928571 | 0.909938 | 1.000000 | 1.000000 | 1.000000 | 1.000000 |
| 2 4 6 7 8 | 0.892857 | 0.851190 | 0.892857 | 0.870785 | 0.964286 | 0.946429 | 0.964286 | 0.954969 |
| 2 4 6 7 9 | 0.857143 | 0.821429 | 0.857143 | 0.838509 | 1.000000 | 1.000000 | 1.000000 | 1.000000 |
| 2 4 6 8 9 | 0.892857 | 0.839286 | 0.892857 | 0.864907 | 1.000000 | 1.000000 | 1.000000 | 1.000000 |
| 2 4 7 8 9 | 0.928571 | 0.892857 | 0.928571 | 0.909938 | 1.000000 | 1.000000 | 1.000000 | 1.000000 |
| 2 5 6 7 8 | 0.750000 | 0.708333 | 0.750000 | 0.727928 | 0.928571 | 0.892857 | 0.928571 | 0.909938 |
| 2 5 6 7 9 | 0.857143 | 0.821429 | 0.857143 | 0.838509 | 1.000000 | 1.000000 | 1.000000 | 1.000000 |
| 2 5 6 8 9 | 0.892857 | 0.839286 | 0.892857 | 0.863699 | 1.000000 | 1.000000 | 1.000000 | 1.000000 |
| 2 5 7 8 9 | 0.964286 | 0.946429 | 0.964286 | 0.954969 | 1.000000 | 1.000000 | 1.000000 | 1.000000 |
| 2 6 7 8 9 | 0.964286 | 0.946429 | 0.964286 | 0.954969 | 1.000000 | 1.000000 | 1.000000 | 1.000000 |
| 3 4 5 6 7 | 0.928571 | 0.892857 | 0.928571 | 0.909938 | 1.000000 | 1.000000 | 1.000000 | 1.000000 |
| 3 4 5 6 8 | 0.964286 | 0.946429 | 0.964286 | 0.954969 | 1.000000 | 1.000000 | 1.000000 | 1.000000 |
| 3 4 5 6 9 | 0.964286 | 0.946429 | 0.964286 | 0.954969 | 1.000000 | 1.000000 | 1.000000 | 1.000000 |
| 3 4 5 7 8 | 1.000000 | 1.000000 | 1.000000 | 1.000000 | 1.000000 | 1.000000 | 1.000000 | 1.000000 |
| 3 4 5 7 9 | 0.928571 | 0.892857 | 0.928571 | 0.909938 | 1.000000 | 1.000000 | 1.000000 | 1.000000 |
| 3 4 5 8 9 | 1.000000 | 1.000000 | 1.000000 | 1.000000 | 1.000000 | 1.000000 | 1.000000 | 1.000000 |
| 3 4 6 7 8 | 1.000000 | 1.000000 | 1.000000 | 1.000000 | 1.000000 | 1.000000 | 1.000000 | 1.000000 |
| 3 4 6 7 9 | 0.928571 | 0.892857 | 0.928571 | 0.909938 | 1.000000 | 1.000000 | 1.000000 | 1.000000 |
| 3 4 6 8 9 | 1.000000 | 1.000000 | 1.000000 | 1.000000 | 1.000000 | 1.000000 | 1.000000 | 1.000000 |
| 3 4 7 8 9 | 1.000000 | 1.000000 | 1.000000 | 1.000000 | 1.000000 | 1.000000 | 1.000000 | 1.000000 |
| 3 5 6 7 8 | 0.964286 | 0.946429 | 0.964286 | 0.954969 | 1.000000 | 1.000000 | 1.000000 | 1.000000 |

|             |          |          |          |          |          |          |          |          |
|-------------|----------|----------|----------|----------|----------|----------|----------|----------|
| 3 5 6 7 9   | 0.964286 | 0.946429 | 0.964286 | 0.954969 | 1.000000 | 1.000000 | 1.000000 | 1.000000 |
| 3 5 6 8 9   | 1.000000 | 1.000000 | 1.000000 | 1.000000 | 1.000000 | 1.000000 | 1.000000 | 1.000000 |
| 3 5 7 8 9   | 0.964286 | 0.946429 | 0.964286 | 0.954969 | 1.000000 | 1.000000 | 1.000000 | 1.000000 |
| 3 6 7 8 9   | 0.964286 | 0.946429 | 0.964286 | 0.954969 | 1.000000 | 1.000000 | 1.000000 | 1.000000 |
| 4 5 6 7 8   | 0.964286 | 0.946429 | 0.964286 | 0.954969 | 1.000000 | 1.000000 | 1.000000 | 1.000000 |
| 4 5 6 7 9   | 0.821429 | 0.767857 | 0.821429 | 0.793478 | 1.000000 | 1.000000 | 1.000000 | 1.000000 |
| 4 5 6 8 9   | 1.000000 | 1.000000 | 1.000000 | 1.000000 | 1.000000 | 1.000000 | 1.000000 | 1.000000 |
| 4 5 7 8 9   | 0.964286 | 0.946429 | 0.964286 | 0.954969 | 1.000000 | 1.000000 | 1.000000 | 1.000000 |
| 4 6 7 8 9   | 1.000000 | 1.000000 | 1.000000 | 1.000000 | 1.000000 | 1.000000 | 1.000000 | 1.000000 |
| 5 6 7 8 9   | 0.964286 | 0.946429 | 0.964286 | 0.954969 | 1.000000 | 1.000000 | 1.000000 | 1.000000 |
| 1 2 3 4 5 6 | 0.892857 | 0.875000 | 0.892857 | 0.883540 | 1.000000 | 1.000000 | 1.000000 | 1.000000 |
| 1 2 3 4 5 7 | 0.857143 | 0.821429 | 0.857143 | 0.838509 | 1.000000 | 1.000000 | 1.000000 | 1.000000 |
| 1 2 3 4 5 8 | 1.000000 | 1.000000 | 1.000000 | 1.000000 | 1.000000 | 1.000000 | 1.000000 | 1.000000 |
| 1 2 3 4 5 9 | 0.892857 | 0.875000 | 0.892857 | 0.883540 | 1.000000 | 1.000000 | 1.000000 | 1.000000 |
| 1 2 3 4 6 7 | 0.892857 | 0.839286 | 0.892857 | 0.864907 | 1.000000 | 1.000000 | 1.000000 | 1.000000 |
| 1 2 3 4 6 8 | 1.000000 | 1.000000 | 1.000000 | 1.000000 | 1.000000 | 1.000000 | 1.000000 | 1.000000 |
| 1 2 3 4 6 9 | 0.928571 | 0.892857 | 0.928571 | 0.909938 | 1.000000 | 1.000000 | 1.000000 | 1.000000 |
| 1 2 3 4 7 8 | 0.964286 | 0.946429 | 0.964286 | 0.954969 | 1.000000 | 1.000000 | 1.000000 | 1.000000 |
| 1 2 3 4 7 9 | 0.857143 | 0.821429 | 0.857143 | 0.838509 | 1.000000 | 1.000000 | 1.000000 | 1.000000 |
| 1 2 3 4 8 9 | 1.000000 | 1.000000 | 1.000000 | 1.000000 | 1.000000 | 1.000000 | 1.000000 | 1.000000 |
| 1 2 3 5 6 7 | 0.964286 | 0.946429 | 0.964286 | 0.954969 | 1.000000 | 1.000000 | 1.000000 | 1.000000 |
| 1 2 3 5 6 8 | 0.964286 | 0.946429 | 0.964286 | 0.954969 | 1.000000 | 1.000000 | 1.000000 | 1.000000 |
| 1 2 3 5 6 9 | 0.928571 | 0.928571 | 0.928571 | 0.928571 | 1.000000 | 1.000000 | 1.000000 | 1.000000 |
| 1 2 3 5 7 8 | 0.785714 | 0.714286 | 0.785714 | 0.748284 | 1.000000 | 1.000000 | 1.000000 | 1.000000 |
| 1 2 3 5 7 9 | 0.892857 | 0.875000 | 0.892857 | 0.883540 | 1.000000 | 1.000000 | 1.000000 | 1.000000 |
| 1 2 3 5 8 9 | 0.964286 | 0.946429 | 0.964286 | 0.954969 | 1.000000 | 1.000000 | 1.000000 | 1.000000 |
| 1 2 3 6 7 8 | 0.964286 | 0.946429 | 0.964286 | 0.954969 | 1.000000 | 1.000000 | 1.000000 | 1.000000 |
| 1 2 3 6 7 9 | 0.928571 | 0.892857 | 0.928571 | 0.909938 | 1.000000 | 1.000000 | 1.000000 | 1.000000 |
| 1 2 3 6 8 9 | 0.964286 | 0.946429 | 0.964286 | 0.954969 | 1.000000 | 1.000000 | 1.000000 | 1.000000 |
| 1 2 3 7 8 9 | 0.964286 | 0.946429 | 0.964286 | 0.954969 | 1.000000 | 1.000000 | 1.000000 | 1.000000 |
| 1 2 4 5 6 7 | 0.857143 | 0.821429 | 0.857143 | 0.838509 | 0.928571 | 0.892857 | 0.928571 | 0.909938 |
| 1 2 4 5 6 8 | 0.928571 | 0.892857 | 0.928571 | 0.909938 | 0.928571 | 0.892857 | 0.928571 | 0.909938 |





|               |          |          |          |          |          |          |          |          |
|---------------|----------|----------|----------|----------|----------|----------|----------|----------|
| 1 4 6 7 8 9   | 1.000000 | 1.000000 | 1.000000 | 1.000000 | 1.000000 | 1.000000 | 1.000000 | 1.000000 |
| 1 5 6 7 8 9   | 0.964286 | 0.946429 | 0.964286 | 0.954969 | 1.000000 | 1.000000 | 1.000000 | 1.000000 |
| 2 3 4 5 6 7   | 0.892857 | 0.875000 | 0.892857 | 0.883540 | 1.000000 | 1.000000 | 1.000000 | 1.000000 |
| 2 3 4 5 6 8   | 0.928571 | 0.892857 | 0.928571 | 0.909938 | 1.000000 | 1.000000 | 1.000000 | 1.000000 |
| 2 3 4 5 6 9   | 0.821429 | 0.767857 | 0.821429 | 0.793271 | 1.000000 | 1.000000 | 1.000000 | 1.000000 |
| 2 3 4 5 7 8   | 0.964286 | 0.946429 | 0.964286 | 0.954969 | 1.000000 | 1.000000 | 1.000000 | 1.000000 |
| 2 3 4 5 7 9   | 0.892857 | 0.875000 | 0.892857 | 0.883540 | 1.000000 | 1.000000 | 1.000000 | 1.000000 |
| 2 3 4 5 8 9   | 0.928571 | 0.892857 | 0.928571 | 0.909938 | 1.000000 | 1.000000 | 1.000000 | 1.000000 |
| 2 3 4 6 7 8   | 0.964286 | 0.946429 | 0.964286 | 0.954969 | 1.000000 | 1.000000 | 1.000000 | 1.000000 |
| 2 3 4 6 7 9   | 0.892857 | 0.875000 | 0.892857 | 0.883540 | 1.000000 | 1.000000 | 1.000000 | 1.000000 |
| 2 3 4 6 8 9   | 0.928571 | 0.892857 | 0.928571 | 0.909938 | 1.000000 | 1.000000 | 1.000000 | 1.000000 |
| 2 3 4 7 8 9   | 0.964286 | 0.946429 | 0.964286 | 0.954969 | 1.000000 | 1.000000 | 1.000000 | 1.000000 |
| 2 3 5 6 7 8   | 0.928571 | 0.892857 | 0.928571 | 0.909938 | 1.000000 | 1.000000 | 1.000000 | 1.000000 |
| 2 3 5 6 7 9   | 0.857143 | 0.821429 | 0.857143 | 0.838509 | 1.000000 | 1.000000 | 1.000000 | 1.000000 |
| 2 3 5 6 8 9   | 1.000000 | 1.000000 | 1.000000 | 1.000000 | 1.000000 | 1.000000 | 1.000000 | 1.000000 |
| 2 3 5 7 8 9   | 0.964286 | 0.946429 | 0.964286 | 0.954969 | 1.000000 | 1.000000 | 1.000000 | 1.000000 |
| 2 3 6 7 8 9   | 0.964286 | 0.946429 | 0.964286 | 0.954969 | 1.000000 | 1.000000 | 1.000000 | 1.000000 |
| 2 4 5 6 7 8   | 0.892857 | 0.851190 | 0.892857 | 0.870785 | 0.964286 | 0.946429 | 0.964286 | 0.954969 |
| 2 4 5 6 7 9   | 0.857143 | 0.821429 | 0.857143 | 0.838509 | 1.000000 | 1.000000 | 1.000000 | 1.000000 |
| 2 4 5 6 8 9   | 0.928571 | 0.892857 | 0.928571 | 0.909938 | 1.000000 | 1.000000 | 1.000000 | 1.000000 |
| 2 4 5 7 8 9   | 0.964286 | 0.946429 | 0.964286 | 0.954969 | 1.000000 | 1.000000 | 1.000000 | 1.000000 |
| 2 4 6 7 8 9   | 0.964286 | 0.946429 | 0.964286 | 0.954969 | 1.000000 | 1.000000 | 1.000000 | 1.000000 |
| 2 5 6 7 8 9   | 0.964286 | 0.946429 | 0.964286 | 0.954969 | 1.000000 | 1.000000 | 1.000000 | 1.000000 |
| 3 4 5 6 7 8   | 1.000000 | 1.000000 | 1.000000 | 1.000000 | 1.000000 | 1.000000 | 1.000000 | 1.000000 |
| 3 4 5 6 7 9   | 0.928571 | 0.892857 | 0.928571 | 0.909938 | 1.000000 | 1.000000 | 1.000000 | 1.000000 |
| 3 4 5 6 8 9   | 1.000000 | 1.000000 | 1.000000 | 1.000000 | 1.000000 | 1.000000 | 1.000000 | 1.000000 |
| 3 4 5 7 8 9   | 1.000000 | 1.000000 | 1.000000 | 1.000000 | 1.000000 | 1.000000 | 1.000000 | 1.000000 |
| 3 4 6 7 8 9   | 1.000000 | 1.000000 | 1.000000 | 1.000000 | 1.000000 | 1.000000 | 1.000000 | 1.000000 |
| 3 5 6 7 8 9   | 0.964286 | 0.946429 | 0.964286 | 0.954969 | 1.000000 | 1.000000 | 1.000000 | 1.000000 |
| 4 5 6 7 8 9   | 0.964286 | 0.946429 | 0.964286 | 0.954969 | 1.000000 | 1.000000 | 1.000000 | 1.000000 |
| 1 2 3 4 5 6 7 | 0.857143 | 0.821429 | 0.857143 | 0.838509 | 1.000000 | 1.000000 | 1.000000 | 1.000000 |
| 1 2 3 4 5 6 8 | 1.000000 | 1.000000 | 1.000000 | 1.000000 | 1.000000 | 1.000000 | 1.000000 | 1.000000 |



|                   |          |          |          |          |          |          |          |          |
|-------------------|----------|----------|----------|----------|----------|----------|----------|----------|
| 2 4 5 6 7 8 9     | 0.964286 | 0.946429 | 0.964286 | 0.954969 | 1.000000 | 1.000000 | 1.000000 | 1.000000 |
| 3 4 5 6 7 8 9     | 1.000000 | 1.000000 | 1.000000 | 1.000000 | 1.000000 | 1.000000 | 1.000000 | 1.000000 |
| 1 2 3 4 5 6 7 8   | 0.964286 | 0.946429 | 0.964286 | 0.954969 | 1.000000 | 1.000000 | 1.000000 | 1.000000 |
| 1 2 3 4 5 6 7 9   | 0.892857 | 0.839286 | 0.892857 | 0.864907 | 1.000000 | 1.000000 | 1.000000 | 1.000000 |
| 1 2 3 4 5 6 8 9   | 1.000000 | 1.000000 | 1.000000 | 1.000000 | 1.000000 | 1.000000 | 1.000000 | 1.000000 |
| 1 2 3 4 5 7 8 9   | 1.000000 | 1.000000 | 1.000000 | 1.000000 | 1.000000 | 1.000000 | 1.000000 | 1.000000 |
| 1 2 3 4 6 7 8 9   | 0.964286 | 0.946429 | 0.964286 | 0.954969 | 1.000000 | 1.000000 | 1.000000 | 1.000000 |
| 1 2 3 5 6 7 8 9   | 0.964286 | 0.946429 | 0.964286 | 0.954969 | 1.000000 | 1.000000 | 1.000000 | 1.000000 |
| 1 2 4 5 6 7 8 9   | 0.964286 | 0.946429 | 0.964286 | 0.954969 | 1.000000 | 1.000000 | 1.000000 | 1.000000 |
| 1 3 4 5 6 7 8 9   | 1.000000 | 1.000000 | 1.000000 | 1.000000 | 1.000000 | 1.000000 | 1.000000 | 1.000000 |
| 2 3 4 5 6 7 8 9   | 1.000000 | 1.000000 | 1.000000 | 1.000000 | 1.000000 | 1.000000 | 1.000000 | 1.000000 |
| 1 2 3 4 5 6 7 8 9 | 1.000000 | 1.000000 | 1.000000 | 1.000000 | 1.000000 | 1.000000 | 1.000000 | 1.000000 |

**Table S10:** SVM and LDA data for 1- and 2-feature combinations including CD43 (feature 9). Combinations showing 100% accuracy are highlighted.

| Feature set | SVM      |          |          |          | LDA      |          |          |          |
|-------------|----------|----------|----------|----------|----------|----------|----------|----------|
|             | Acc.     | Prec.    | Rec.     | F1       | Acc.     | Prec.    | Rec.     | F1       |
| 9           | 1.000000 | 1.000000 | 1.000000 | 1.000000 | 1.000000 | 1.000000 | 1.000000 | 1.000000 |
| 1 9         | 0.964286 | 0.946429 | 0.964286 | 0.954969 | 1.000000 | 1.000000 | 1.000000 | 1.000000 |
| 2 9         | 0.535714 | 0.410714 | 0.535714 | 0.463946 | 1.000000 | 1.000000 | 1.000000 | 1.000000 |
| 3 9         | 1.000000 | 1.000000 | 1.000000 | 1.000000 | 1.000000 | 1.000000 | 1.000000 | 1.000000 |
| 4 9         | 0.821429 | 0.732143 | 0.821429 | 0.773637 | 1.000000 | 1.000000 | 1.000000 | 1.000000 |
| 5 9         | 0.964286 | 0.946429 | 0.964286 | 0.954969 | 1.000000 | 1.000000 | 1.000000 | 1.000000 |
| 6 9         | 1.000000 | 1.000000 | 1.000000 | 1.000000 | 1.000000 | 1.000000 | 1.000000 | 1.000000 |
| 7 9         | 0.892857 | 0.857143 | 0.892857 | 0.874142 | 1.000000 | 1.000000 | 1.000000 | 1.000000 |
| 8 9         | 0.964286 | 0.946429 | 0.964286 | 0.954969 | 1.000000 | 1.000000 | 1.000000 | 1.000000 |

## 4 SPSS-based LDA

**Table S11:** LDA classification results using CD43 only

| Classification Results <sup>a,c</sup>                                                                                                                                        |       |                            |     |     |     |     |     |     |     |       |     |
|------------------------------------------------------------------------------------------------------------------------------------------------------------------------------|-------|----------------------------|-----|-----|-----|-----|-----|-----|-----|-------|-----|
| Items                                                                                                                                                                        | pH    | Predicted Group Membership |     |     |     |     |     |     |     | Total |     |
|                                                                                                                                                                              |       | 2.8                        | 3.9 | 4.9 | 6.6 | 6.9 | 8   | 9.1 | 10  |       |     |
| Original                                                                                                                                                                     | Count | 2.76                       | 4   | 0   | 0   | 0   | 0   | 0   | 0   | 0     | 4   |
|                                                                                                                                                                              |       | 3.92                       | 0   | 4   | 0   | 0   | 0   | 0   | 0   | 0     | 4   |
|                                                                                                                                                                              |       | 4.87                       | 0   | 0   | 4   | 0   | 0   | 0   | 0   | 0     | 4   |
|                                                                                                                                                                              |       | 6.64                       | 0   | 0   | 0   | 4   | 0   | 0   | 0   | 0     | 4   |
|                                                                                                                                                                              |       | 6.9                        | 0   | 0   | 0   | 0   | 4   | 0   | 0   | 0     | 4   |
|                                                                                                                                                                              |       | 8                          | 0   | 0   | 0   | 0   | 0   | 4   | 0   | 0     | 4   |
|                                                                                                                                                                              |       | 9.05                       | 0   | 0   | 0   | 0   | 0   | 0   | 4   | 0     | 4   |
|                                                                                                                                                                              |       | 10                         | 0   | 0   | 0   | 0   | 0   | 0   | 0   | 4     | 4   |
|                                                                                                                                                                              | %     | 2.76                       | 100 | 0   | 0   | 0   | 0   | 0   | 0   | 0     | 100 |
|                                                                                                                                                                              |       | 3.92                       | 0   | 100 | 0   | 0   | 0   | 0   | 0   | 0     | 100 |
|                                                                                                                                                                              |       | 4.87                       | 0   | 0   | 100 | 0   | 0   | 0   | 0   | 0     | 100 |
|                                                                                                                                                                              |       | 6.64                       | 0   | 0   | 0   | 100 | 0   | 0   | 0   | 0     | 100 |
|                                                                                                                                                                              |       | 6.9                        | 0   | 0   | 0   | 0   | 100 | 0   | 0   | 0     | 100 |
|                                                                                                                                                                              |       | 8                          | 0   | 0   | 0   | 0   | 0   | 100 | 0   | 0     | 100 |
| 9.05                                                                                                                                                                         |       | 0                          | 0   | 0   | 0   | 0   | 0   | 100 | 0   | 100   |     |
| 10                                                                                                                                                                           |       | 0                          | 0   | 0   | 0   | 0   | 0   | 0   | 100 | 100   |     |
| Cross-validated <sup>b</sup>                                                                                                                                                 | Count | 2.76                       | 4   | 0   | 0   | 0   | 0   | 0   | 0   | 0     | 4   |
|                                                                                                                                                                              |       | 3.92                       | 0   | 4   | 0   | 0   | 0   | 0   | 0   | 0     | 4   |
|                                                                                                                                                                              |       | 4.87                       | 0   | 0   | 4   | 0   | 0   | 0   | 0   | 0     | 4   |
|                                                                                                                                                                              |       | 6.64                       | 0   | 0   | 0   | 4   | 0   | 0   | 0   | 0     | 4   |
|                                                                                                                                                                              |       | 6.9                        | 0   | 0   | 0   | 0   | 4   | 0   | 0   | 0     | 4   |
|                                                                                                                                                                              |       | 8                          | 0   | 0   | 0   | 0   | 0   | 4   | 0   | 0     | 4   |
|                                                                                                                                                                              |       | 9.05                       | 0   | 0   | 0   | 0   | 0   | 0   | 4   | 0     | 4   |
|                                                                                                                                                                              |       | 10                         | 0   | 0   | 0   | 0   | 0   | 0   | 0   | 4     | 4   |
|                                                                                                                                                                              | %     | 2.76                       | 100 | 0   | 0   | 0   | 0   | 0   | 0   | 0     | 100 |
|                                                                                                                                                                              |       | 3.92                       | 0   | 100 | 0   | 0   | 0   | 0   | 0   | 0     | 100 |
|                                                                                                                                                                              |       | 4.87                       | 0   | 0   | 100 | 0   | 0   | 0   | 0   | 0     | 100 |
|                                                                                                                                                                              |       | 6.64                       | 0   | 0   | 0   | 100 | 0   | 0   | 0   | 0     | 100 |
|                                                                                                                                                                              |       | 6.9                        | 0   | 0   | 0   | 0   | 100 | 0   | 0   | 0     | 100 |
|                                                                                                                                                                              |       | 8                          | 0   | 0   | 0   | 0   | 0   | 100 | 0   | 0     | 100 |
| 9.05                                                                                                                                                                         |       | 0                          | 0   | 0   | 0   | 0   | 0   | 100 | 0   | 100   |     |
| 10                                                                                                                                                                           |       | 0                          | 0   | 0   | 0   | 0   | 0   | 0   | 100 | 100   |     |
| a. 100.0% of original grouped cases correctly classified.                                                                                                                    |       |                            |     |     |     |     |     |     |     |       |     |
| b. Cross validation is done only for those cases in the analysis. In cross validation, each case is classified by the functions derived from all cases other than that case. |       |                            |     |     |     |     |     |     |     |       |     |
| c. 100.0% of cross-validated grouped cases correctly classified.                                                                                                             |       |                            |     |     |     |     |     |     |     |       |     |

**Table S1:** Summary of canonical discriminant function by using CD43 only

| <b>Eigenvalues</b>   |               |               |              |                       |
|----------------------|---------------|---------------|--------------|-----------------------|
| Function             | Eigenvalue    | % of Variance | Cumulative % | Canonical Correlation |
| 1                    | 2866.052      | 100           | 100          | 1                     |
| <b>Wilks' Lambda</b> |               |               |              |                       |
| Test of Function(s)  | Wilks' Lambda | Chi-square    | df           | Sig.                  |
| 1                    | 0             | 210.968       | 7            | <.001                 |

**Table S2:** Functions at group centroids using CD43 only

| pH level | Function |
|----------|----------|
| 2.76     | -2.288   |
| 3.92     | 44.289   |
| 4.87     | 69.607   |
| 6.64     | 21.624   |
| 6.9      | 28.512   |
| 8        | -38.346  |
| 9.05     | -58.543  |
| 10.03    | -64.855  |

**Table S34:** LDA classification of array built by CD43 and CD69.

| Classification Results <sup>a,c</sup> |       |      |                            |     |     |     |     |     |     |       |     |
|---------------------------------------|-------|------|----------------------------|-----|-----|-----|-----|-----|-----|-------|-----|
| Items                                 |       | pH   | Predicted Group Membership |     |     |     |     |     |     | Total |     |
|                                       |       |      | 2.8                        | 3.9 | 4.9 | 6.6 | 6.9 | 8   | 9.1 |       | 10  |
| Original                              | Count | 2.76 | 4                          | 0   | 0   | 0   | 0   | 0   | 0   | 0     | 4   |
|                                       |       | 3.92 | 0                          | 4   | 0   | 0   | 0   | 0   | 0   | 0     | 4   |
|                                       |       | 4.87 | 0                          | 0   | 4   | 0   | 0   | 0   | 0   | 0     | 4   |
|                                       |       | 6.64 | 0                          | 0   | 0   | 4   | 0   | 0   | 0   | 0     | 4   |
|                                       |       | 6.9  | 0                          | 0   | 0   | 0   | 4   | 0   | 0   | 0     | 4   |
|                                       |       | 8    | 0                          | 0   | 0   | 0   | 0   | 4   | 0   | 0     | 4   |
|                                       |       | 9.05 | 0                          | 0   | 0   | 0   | 0   | 0   | 4   | 0     | 4   |
|                                       |       | 10   | 0                          | 0   | 0   | 0   | 0   | 0   | 0   | 4     | 4   |
|                                       | %     | 2.76 | 100                        | 0   | 0   | 0   | 0   | 0   | 0   | 0     | 100 |
|                                       |       | 3.92 | 0                          | 100 | 0   | 0   | 0   | 0   | 0   | 0     | 100 |
|                                       |       | 4.87 | 0                          | 0   | 100 | 0   | 0   | 0   | 0   | 0     | 100 |
|                                       |       | 6.64 | 0                          | 0   | 0   | 100 | 0   | 0   | 0   | 0     | 100 |
|                                       |       | 6.9  | 0                          | 0   | 0   | 0   | 100 | 0   | 0   | 0     | 100 |
|                                       |       | 8    | 0                          | 0   | 0   | 0   | 0   | 100 | 0   | 0     | 100 |
| 9.05                                  |       | 0    | 0                          | 0   | 0   | 0   | 0   | 100 | 0   | 100   |     |
| 10                                    |       | 0    | 0                          | 0   | 0   | 0   | 0   | 0   | 100 | 100   |     |
| Cross-validated <sup>b</sup>          | Count | 2.76 | 4                          | 0   | 0   | 0   | 0   | 0   | 0   | 0     | 4   |
|                                       |       | 3.92 | 0                          | 4   | 0   | 0   | 0   | 0   | 0   | 0     | 4   |
|                                       |       | 4.87 | 0                          | 0   | 4   | 0   | 0   | 0   | 0   | 0     | 4   |
|                                       |       | 6.64 | 0                          | 0   | 0   | 4   | 0   | 0   | 0   | 0     | 4   |
|                                       |       | 6.9  | 0                          | 0   | 0   | 0   | 4   | 0   | 0   | 0     | 4   |
|                                       |       | 8    | 0                          | 0   | 0   | 0   | 0   | 4   | 0   | 0     | 4   |
|                                       |       | 9.05 | 0                          | 0   | 0   | 0   | 0   | 0   | 4   | 0     | 4   |
|                                       |       | 10   | 0                          | 0   | 0   | 0   | 0   | 0   | 0   | 4     | 4   |
|                                       | %     | 2.76 | 100                        | 0   | 0   | 0   | 0   | 0   | 0   | 0     | 100 |
|                                       |       | 3.92 | 0                          | 100 | 0   | 0   | 0   | 0   | 0   | 0     | 100 |
|                                       |       | 4.87 | 0                          | 0   | 100 | 0   | 0   | 0   | 0   | 0     | 100 |
|                                       |       | 6.64 | 0                          | 0   | 0   | 100 | 0   | 0   | 0   | 0     | 100 |
|                                       |       | 6.9  | 0                          | 0   | 0   | 0   | 100 | 0   | 0   | 0     | 100 |
|                                       |       | 8    | 0                          | 0   | 0   | 0   | 0   | 100 | 0   | 0     | 100 |
| 9.05                                  |       | 0    | 0                          | 0   | 0   | 0   | 0   | 100 | 0   | 100   |     |
| 10                                    |       | 0    | 0                          | 0   | 0   | 0   | 0   | 0   | 100 | 100   |     |

a. 100.0% of original grouped cases correctly classified.

b. Cross validation is done only for those cases in the analysis. In cross validation, each case is classified by the functions derived from all cases other than that case.

c. 100.0% of cross-validated grouped cases correctly classified.

**Table S4:** Summary of canonical discriminant function using array built by CD43 and CD69.

| Eigenvalues                                                            |                       |               |              |                       |
|------------------------------------------------------------------------|-----------------------|---------------|--------------|-----------------------|
| Function                                                               | Eigenvalue            | % of Variance | Cumulative % | Canonical Correlation |
| 1                                                                      | 2867.290 <sup>a</sup> | 84.3          | 84.3         | 1                     |
| 2                                                                      | 534.396 <sup>a</sup>  | 15.7          | 100          | 0.999                 |
| a. First 2 canonical discriminant functions were used in the analysis. |                       |               |              |                       |
| Wilks' Lambda                                                          |                       |               |              |                       |
| Test of Function(s)                                                    | Wilks' Lambda         | Chi-square    | df           | Sig.                  |
| 1 through 2                                                            | 0                     | 370.356       | 14           | <.001                 |
| 2                                                                      | 0.002                 | 163.358       | 6            | <.001                 |

**Table S5:** Functions at group centroids using array built by CD43 and CD69

| pH level | Function |         |
|----------|----------|---------|
|          | 1        | 2       |
| 2.76     | -3.252   | -41.79  |
| 3.92     | 43.839   | -20.034 |
| 4.87     | 69.764   | 6.006   |
| 6.64     | 22.226   | 25.888  |
| 6.9      | 28.856   | 14.576  |
| 8        | -38.091  | 11.478  |
| 9.05     | -58.501  | 2.504   |
| 10.03    | -64.841  | 1.372   |

**Table S6:** LDA classification results by using array built by CD43 and CD25.

| Classification Results <sup>a,c</sup> |       |      |                            |     |     |     |     |     |     |       |     |
|---------------------------------------|-------|------|----------------------------|-----|-----|-----|-----|-----|-----|-------|-----|
| Items                                 |       | pH   | Predicted Group Membership |     |     |     |     |     |     | Total |     |
|                                       |       |      | 2.8                        | 3.9 | 4.9 | 6.6 | 6.9 | 8   | 9.1 |       | 10  |
| Original                              | Count | 2.76 | 4                          | 0   | 0   | 0   | 0   | 0   | 0   | 0     | 4   |
|                                       |       | 3.92 | 0                          | 4   | 0   | 0   | 0   | 0   | 0   | 0     | 4   |
|                                       |       | 4.87 | 0                          | 0   | 4   | 0   | 0   | 0   | 0   | 0     | 4   |
|                                       |       | 6.64 | 0                          | 0   | 0   | 4   | 0   | 0   | 0   | 0     | 4   |
|                                       |       | 6.9  | 0                          | 0   | 0   | 0   | 4   | 0   | 0   | 0     | 4   |
|                                       |       | 8    | 0                          | 0   | 0   | 0   | 0   | 4   | 0   | 0     | 4   |
|                                       |       | 9.05 | 0                          | 0   | 0   | 0   | 0   | 0   | 4   | 0     | 4   |
|                                       |       | 10   | 0                          | 0   | 0   | 0   | 0   | 0   | 0   | 4     | 4   |
|                                       | %     | 2.76 | 100                        | 0   | 0   | 0   | 0   | 0   | 0   | 0     | 100 |
|                                       |       | 3.92 | 0                          | 100 | 0   | 0   | 0   | 0   | 0   | 0     | 100 |
|                                       |       | 4.87 | 0                          | 0   | 100 | 0   | 0   | 0   | 0   | 0     | 100 |
|                                       |       | 6.64 | 0                          | 0   | 0   | 100 | 0   | 0   | 0   | 0     | 100 |
|                                       |       | 6.9  | 0                          | 0   | 0   | 0   | 100 | 0   | 0   | 0     | 100 |
|                                       |       | 8    | 0                          | 0   | 0   | 0   | 0   | 100 | 0   | 0     | 100 |
| 9.05                                  |       | 0    | 0                          | 0   | 0   | 0   | 0   | 100 | 0   | 100   |     |
| 10                                    |       | 0    | 0                          | 0   | 0   | 0   | 0   | 0   | 100 | 100   |     |
| Cross-validated <sup>b</sup>          | Count | 2.76 | 4                          | 0   | 0   | 0   | 0   | 0   | 0   | 0     | 4   |
|                                       |       | 3.92 | 0                          | 4   | 0   | 0   | 0   | 0   | 0   | 0     | 4   |
|                                       |       | 4.87 | 0                          | 0   | 4   | 0   | 0   | 0   | 0   | 0     | 4   |
|                                       |       | 6.64 | 0                          | 0   | 0   | 4   | 0   | 0   | 0   | 0     | 4   |
|                                       |       | 6.9  | 0                          | 0   | 0   | 0   | 4   | 0   | 0   | 0     | 4   |
|                                       |       | 8    | 0                          | 0   | 0   | 0   | 0   | 4   | 0   | 0     | 4   |
|                                       |       | 9.05 | 0                          | 0   | 0   | 0   | 0   | 0   | 4   | 0     | 4   |
|                                       |       | 10   | 0                          | 0   | 0   | 0   | 0   | 0   | 0   | 4     | 4   |
|                                       | %     | 2.76 | 100                        | 0   | 0   | 0   | 0   | 0   | 0   | 0     | 100 |
|                                       |       | 3.92 | 0                          | 100 | 0   | 0   | 0   | 0   | 0   | 0     | 100 |
|                                       |       | 4.87 | 0                          | 0   | 100 | 0   | 0   | 0   | 0   | 0     | 100 |
|                                       |       | 6.64 | 0                          | 0   | 0   | 100 | 0   | 0   | 0   | 0     | 100 |
|                                       |       | 6.9  | 0                          | 0   | 0   | 0   | 100 | 0   | 0   | 0     | 100 |
|                                       |       | 8    | 0                          | 0   | 0   | 0   | 0   | 100 | 0   | 0     | 100 |
| 9.05                                  |       | 0    | 0                          | 0   | 0   | 0   | 0   | 100 | 0   | 100   |     |
| 10                                    |       | 0    | 0                          | 0   | 0   | 0   | 0   | 0   | 100 | 100   |     |

a. 100.0% of original grouped cases correctly classified.

b. Cross validation is done only for those cases in the analysis. In cross validation, each case is classified by the functions derived from all cases other than that case.

c. 100.0% of cross-validated grouped cases correctly classified.

**Table S7:** Summary of canonical discriminant function using array built by CD43 and CD25.

| Eigenvalues                                                            |                       |               |              |                       |
|------------------------------------------------------------------------|-----------------------|---------------|--------------|-----------------------|
| Function                                                               | Eigenvalue            | % of Variance | Cumulative % | Canonical Correlation |
| 1                                                                      | 3357.485 <sup>a</sup> | 98.2          | 98.2         | 1                     |
| 2                                                                      | 61.584 <sup>a</sup>   | 1.8           | 100          | 0.992                 |
| a. First 2 canonical discriminant functions were used in the analysis. |                       |               |              |                       |
| Wilks' Lambda                                                          |                       |               |              |                       |
| Test of Function(s)                                                    | Wilks' Lambda         | Chi-square    | df           | Sig.                  |
| 1 through 2                                                            | 0                     | 318.65        | 14           | <.001                 |
| 2                                                                      | 0.016                 | 107.549       | 6            | <.001                 |



**Table S89:** Functions at group centroids by using array built by CD43 and CD25.

| pH level | Function |        |
|----------|----------|--------|
|          | 1        | 2      |
| 2.76     | -8.219   | 13.707 |
| 3.92     | 45.033   | 7.119  |
| 4.87     | 75.528   | -0.162 |
| 6.64     | 26.668   | -7.706 |
| 6.9      | 34.036   | -7.47  |
| 8        | -40.047  | -3.638 |
| 9.05     | -62.812  | -1.562 |
| 10.03    | -70.187  | -0.288 |

## 5 MATLAB based GPR

### 5.1 MATLAB GPR code development

For developing a pH sensing array for GPR prediction application, we developed the GPR based MATLAB. GPR is a non-parametric, Bayesian machine learning method that can be used for regression problems. It is based on the Gaussian Process, a collection of random variables where any finite subset of these variables follows a multivariate Gaussian distribution. GPR is particularly useful in cases where the relationship between the input features and the target variable is complex and non-linear. In GPR, the objective is to learn a function that best maps the input features to the target variable. This function is modelled as a Gaussian Process with a mean function and a covariance function (also called the kernel function). The kernel function measures the similarity between the input data points and encodes the correlation between the target values. The choice of the kernel function can have a significant impact on the performance of the model. Here introduces the MATLAB code development based on the code flow. A step-by-step explanation is provided in supporting material. The script performed data preprocessing, model training, prediction, and performance evaluation using various feature combinations.

**Data Loading and Preprocessing:** The code began by clearing the workspace, closing all figures, and turning off warnings. It then loaded the training and test datasets from Excel files:

```
clc
clear all
close all
warning off

%% Load data
train_data = xlsread('DataHaobo.xlsx');
test_data_full = xlsread('Test.xlsx');
```

The features (`X\_train` and `X\_test`) and target variables (`y\_train` and `y\_test\_actual`) were extracted from the datasets. The target variable for training was also converted to a logarithmic scale to improve the performance of the GPR model:

```
% Features and target variables
X_train = train_data(:, 2:end); % Features for training
y_train = train_data(:, 1); % Target for training

X_test = test_data_full(:, 2:end); % Features for testing
y_test_actual = test_data_full(:, 1); % Actual pH for testing

% Convert target to logarithmic scale for GPR
y_train_log = log(y_train);
```

**Feature Combinations and Directory Setup:** The script generated all possible combinations of features to be used for model training and initialised directories for storing the results:

```

% Initialize combinations and results storage
num_features = size(X_train, 2);
combinations = cell(num_features, 1);

    combinations{k} = nchoosek(1:num_features, k);
end

% Create directories for results if they don't exist
if ~exist('GPR_result', 'dir')
    mkdir('GPR_result')
end
if ~exist('GPR_result/Figures', 'dir')
    mkdir('GPR_result/Figures')
end
if ~exist('GPR_result/EditableFigures', 'dir')
    mkdir('GPR_result/EditableFigures')
end

```

Model Training and Prediction: For each combination of features, the script trained a GPR model and made predictions on the test data. The Kernel Function with SquaredExponential was applied during the GPR trainer modelling. There were 4 test set for each of the array selection. It then computed various evaluation metrics and saved the results:

```

% Loop through all feature combinations
for k = 1:num_features
    for i = 1:size(combinations{k}, 1)
        feature_combination = combinations{k}(i, :);
        X_train_comb = X_train(:, feature_combination);
        X_test_comb = X_test(:, feature_combination);

        % Train the GPR model
        gprMdl = fitrgp(X_train_comb, y_train_log);

        % Predict target variable for test data
        y_pred_log = predict(gprMdl, X_test_comb);
        y_pred = exp(y_pred_log);

        % Compute predictions for all training data points
        [ypred_log, ~, yci_log] = predict(gprMdl, X_train_comb);
        ypred = exp(ypred_log);
        yci = exp(yci_log);

        % Calculate average predicted pH value and standard deviation for n=4
        mean_y_pred = mean(y_pred);
        std_y_pred = std(y_pred);
        prediction_range = [mean_y_pred - std_y_pred, mean_y_pred + std_y_pred];

        % Convert kernel information to string
        kernelInfoStr = struct2str(gprMdl.KernelInformation);

        % Save the results in a text file
    end
end

```

```

result_filename = ['GPR_result/FeatureCombination_', mat2str(feature_combination), '.txt'];
fileID = fopen(result_filename, 'w');

fprintf(fileID, 'Feature Combination: %s\n', mat2str(feature_combination));
fprintf(fileID, 'Kernel Information: %s\n', kernelInfoStr);
fprintf(fileID, 'Kernel Function: %s\n', gprMdl.KernelFunction);
fprintf(fileID, 'Standard deviation of predicted values (n=4): %.10f\n', std_y_pred);
fprintf(fileID, 'Test pH of %.2f gave an average prediction of %.10f ± %.10f (standard deviation, n=%d)\n',
y_test_actual(1), mean_y_pred, std_y_pred, size(X_test_comb, 1));
fprintf(fileID, 'Prediction range: %.10f to %.10f\n', prediction_range(1), prediction_range(2));

% Calculate and display the coefficient of determination (R2), MSE, and MAE
R2 = 1 - sum((y_train - ypred).^2) / sum((y_train - mean(y_train)).^2);
MSE = mean((y_train - ypred).^2);
MAE = mean(abs(y_train - ypred));

fprintf(fileID, 'Coefficient of Determination (R2): %.10f\n', R2);
fprintf(fileID, 'Mean Squared Error (MSE): %.10f\n', MSE);
fprintf(fileID, 'Mean Absolute Error (MAE): %.10f\n', MAE);

fclose(fileID);

% Append results to the result table
result_table = [result_table; {mat2str(feature_combination), kernelInfoStr, gprMdl.KernelFunction,
std_y_pred, mean_y_pred, std_y_pred, size(X_test_comb, 1), prediction_range(1), prediction_range(2), R2,
MSE, MAE}];

```

Visualisation and Results Saving: The code visualised the predicted versus actual pH values for each feature combination and saved the figures in both TIFF and MATLAB editable formats. It also saved the results to an Excel file for further analysis:

```

% Plot predicted vs actual values
figure;
hold on;
% Add error bars to the training data
error_bar = (yci(:, 2) - yci(:, 1)) / 2;
errorbar(y_train, ypred, error_bar, 'bo');
plot(y_train, y_train, 'k-');
xlabel('Actual pH');
ylabel('Predicted pH');
title(['GPR - Feature Combination: ', mat2str(feature_combination)]);
legend('Predicted vs actual', 'Ideal line', 'Location', 'Northwest');
% Plot predicted test points
for j = 1:size(X_test_comb, 1)
    plot(y_test_actual(j), y_pred(j), 'r*', 'MarkerSize', 10);
end

% Save figure in TIFF format
print('-dtiff', '-r1200', ['GPR_result/Figures/GPR_FeatureCombination_', mat2str(feature_combination),
'.tiff']);

% Save figure in MATLAB editable format

```

```

    saveas(gcf, ['GPR_result/EditableFigures/GPR_FeatureCombination_', mat2str(feature_combination),
'.fig']);

```

```

    % Close the plot window
    close(gcf);
end
end

```

```

% Save results to Excel file
result_headers = {'Feature Combination', 'Kernel Information', 'Kernel Function', 'Std Deviation', 'Mean
Prediction', 'Std Dev', 'Num Test Points', 'Prediction Range Min', 'Prediction Range Max', 'R^2', 'MSE', 'MAE'};
result_table = cell2table(result_table, 'VariableNames', result_headers);
writetable(result_table, 'GPR_result/GPR_results.xlsx');

```

Utility Functions: The script included utility functions for converting structures and arrays to strings, which were used in the process of saving the results:

```

% Function to convert structure to string
function str = struct2str(structVar)
    str = "";
    fields = fieldnames(structVar);
    for i = 1:numel(fields)
        fieldName = fields{i};
        fieldValue = structVar.(fieldName);
        if isstruct(fieldValue)
            fieldValueStr = struct2str(fieldValue);
        else
            fieldValueStr = array2str(fieldValue);
        end
        str = [str, fieldName, ': ', fieldValueStr, ', '];
    end
end
end

```

```

% Function to convert array to string
function str = array2str(array)
    if isnumeric(array) || islogical(array)
        str = mat2str(array);
    elseif ischar(array)
        str = array;
    elseif isstring(array)
        str = char(array);
    else
        str = 'Unsupported data type';
    end
end
end

```

```

% Function to extract and display kernel parameters names and values
function getKernelParameters(gprMdl)
    kernelInfo = gprMdl.KernelInformation;
    paramName = gprMdl.KernelInformation.KernelParameterNames;
    paramValues = kernelInfo.KernelParameters;

```

```
disp('Kernel parameter names:');
disp(paramName);

disp('Kernel parameter values:');
for i = 1:numel(paramValues)
    fprintf('%0.10f\n', paramValues(i));
end
end
```

In summary, this paper presents a well-structured, modular, and efficient MATLAB code implementation of Gaussian Process Regression (GPR) for predicting pH values. The code adheres to design principles, ensuring an organized and systematic approach to addressing the regression problem. This comprehensive approach ensured robust evaluation of different feature combinations, providing insights into the optimal configuration for accurate pH prediction using GPR. Modularity is a key feature of the code, with distinct sections dedicated to data loading, pre-processing, model training, prediction, statistical analysis, and visualization. This separation not only improves readability and maintainability but also makes it more user-friendly. The code's flexibility allows for easy adaptation to other datasets or regression problems, requiring only minor adjustments to the input data file and feature/target variable assignments. One of the code's main strengths is its user-friendliness, enabling users with limited coding and MATLAB experience to quickly adapt it for specific regression problems with minimal modifications. Overall, the MATLAB code described in this paper offers a practical, organized, and user-friendly solution for implementing GPR, making it a valuable tool for a wide range of applications and users.

## 5.2 GPR results

**Table S20:** The most promising feature combination is highlighted associate with their GPR performance

| Feature Combination | Test pH | Kernel Parameters                  | Std Deviation | Mean Prediction | Num Test Points | Prediction Range Min | Prediction Range Max | R <sup>2</sup> | MSE   | MAE   |
|---------------------|---------|------------------------------------|---------------|-----------------|-----------------|----------------------|----------------------|----------------|-------|-------|
| 9                   | 6.9     | 84.75922314882;0.362353037454844   | 0.120         | 7.259           | 4               | 7.139                | 7.379                | 1.000          | 0.000 | 0.009 |
| 3 9                 | 6.9     | 427.6691970988;0.316333780807546   | 0.110         | 6.795           | 4               | 6.685                | 6.904                | 1.000          | 0.000 | 0.009 |
| 6 9                 | 6.9     | 13068.578066183;0.346680829348127  | 0.069         | 7.154           | 4               | 7.085                | 7.223                | 1.000          | 0.002 | 0.024 |
| 3 9                 | 4.07    | 86829.8011803673;0.468063851297936 | 0.106         | 4.039           | 4               | 3.934                | 4.145                | 0.987          | 0.055 | 0.165 |
| 3 9                 | 9.05    | 75299.2182486293;0.437275578262553 | 0.035         | 8.970           | 4               | 8.934                | 9.006                | 0.996          | 0.019 | 0.102 |

## 6 GPR based pH sensing application with milk

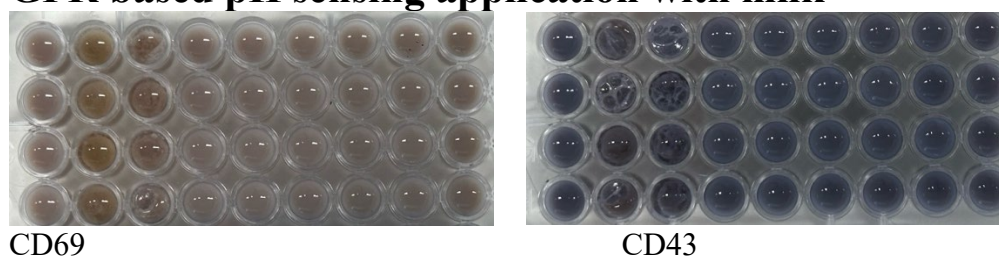

**Figure S12:** Naked eye visual observation of CDs sensor array applied with milk under varying pH conditions (Each photo contains four replicates, with each row representing one replicate. From left to right, the columns represent CDs in MilliQ water and spoiled milk, followed by CDs with spoiled milk exposed to pH levels 3.06, 4.04, 5.55, 6.15, 7.2, 8.05, 9.25, and 10.09).
